# Supplementary material for: Discovery of pyrazolo[3,4-d]pyrimidine and pyrazolo[4,3-e][1,2,4]triazolo[1,5-c]pyrimidine derivatives as novel CDK2 inhibitors: synthesis, biological and molecular modeling investigations
Source: Royal Society of Chemistry journal article supplement (doi:10.1039/d2ra01968j), 2022-01-01
Supplement: d2ra01968j1.pdf [file d2ra01968j1.pdf]

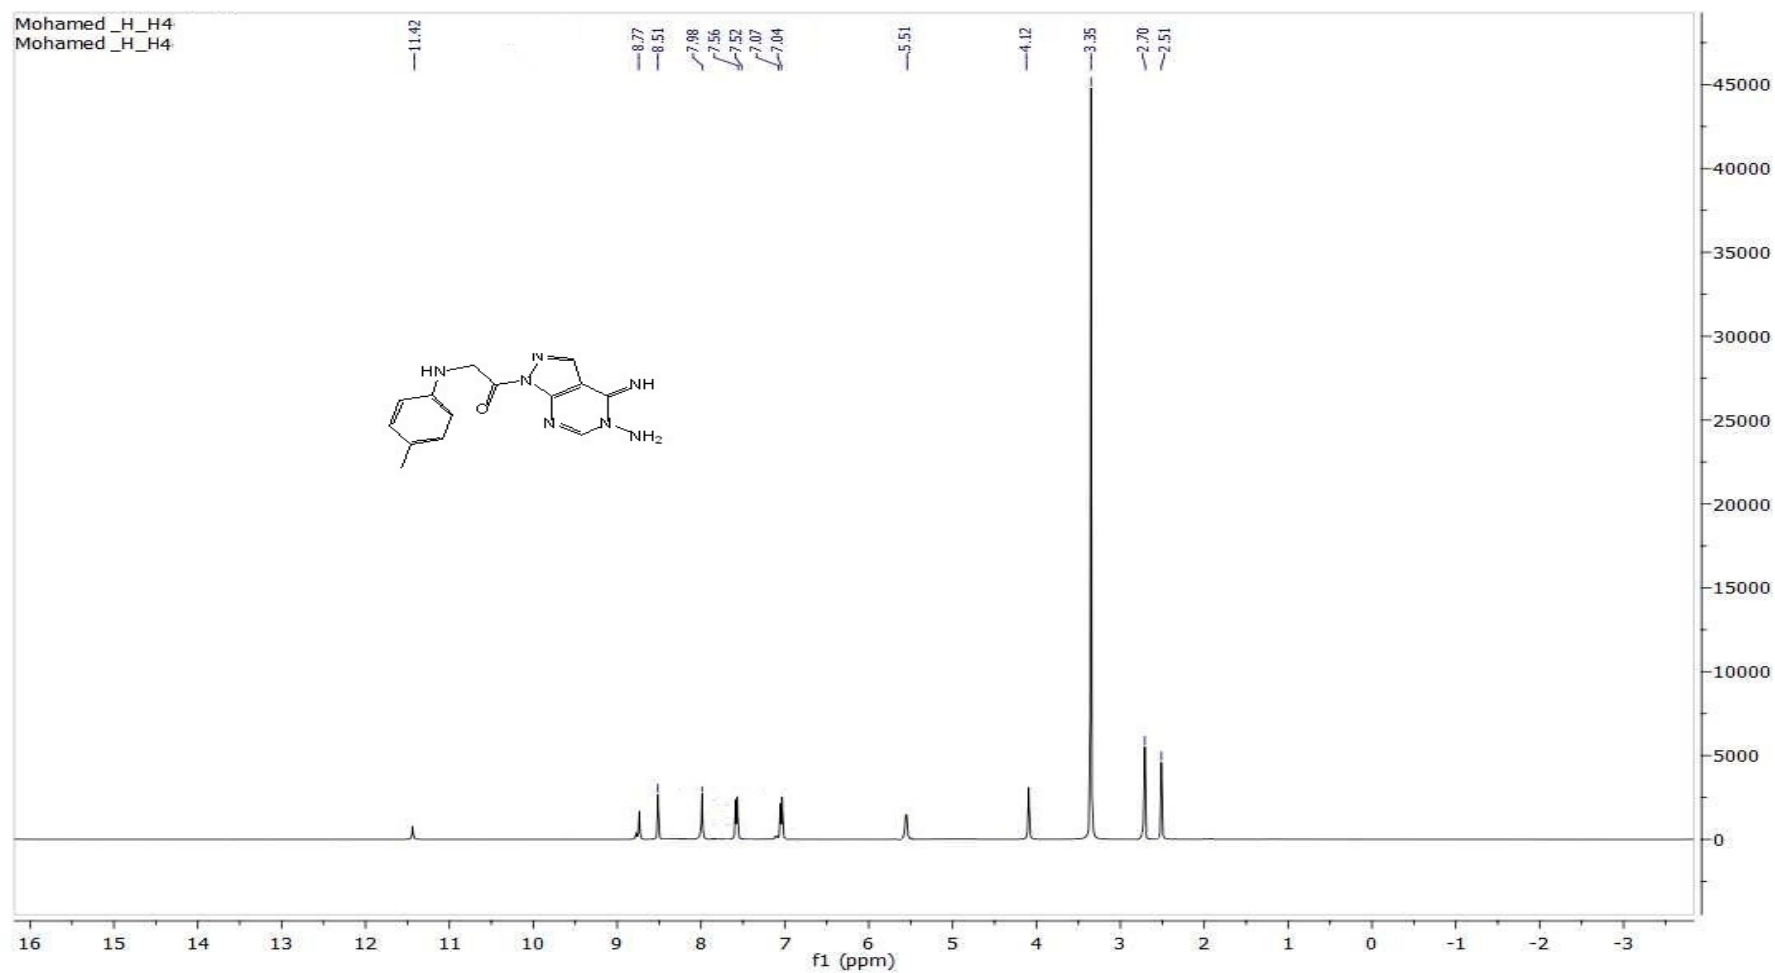

<sup>1</sup>H-NMR FOR COMP. 4

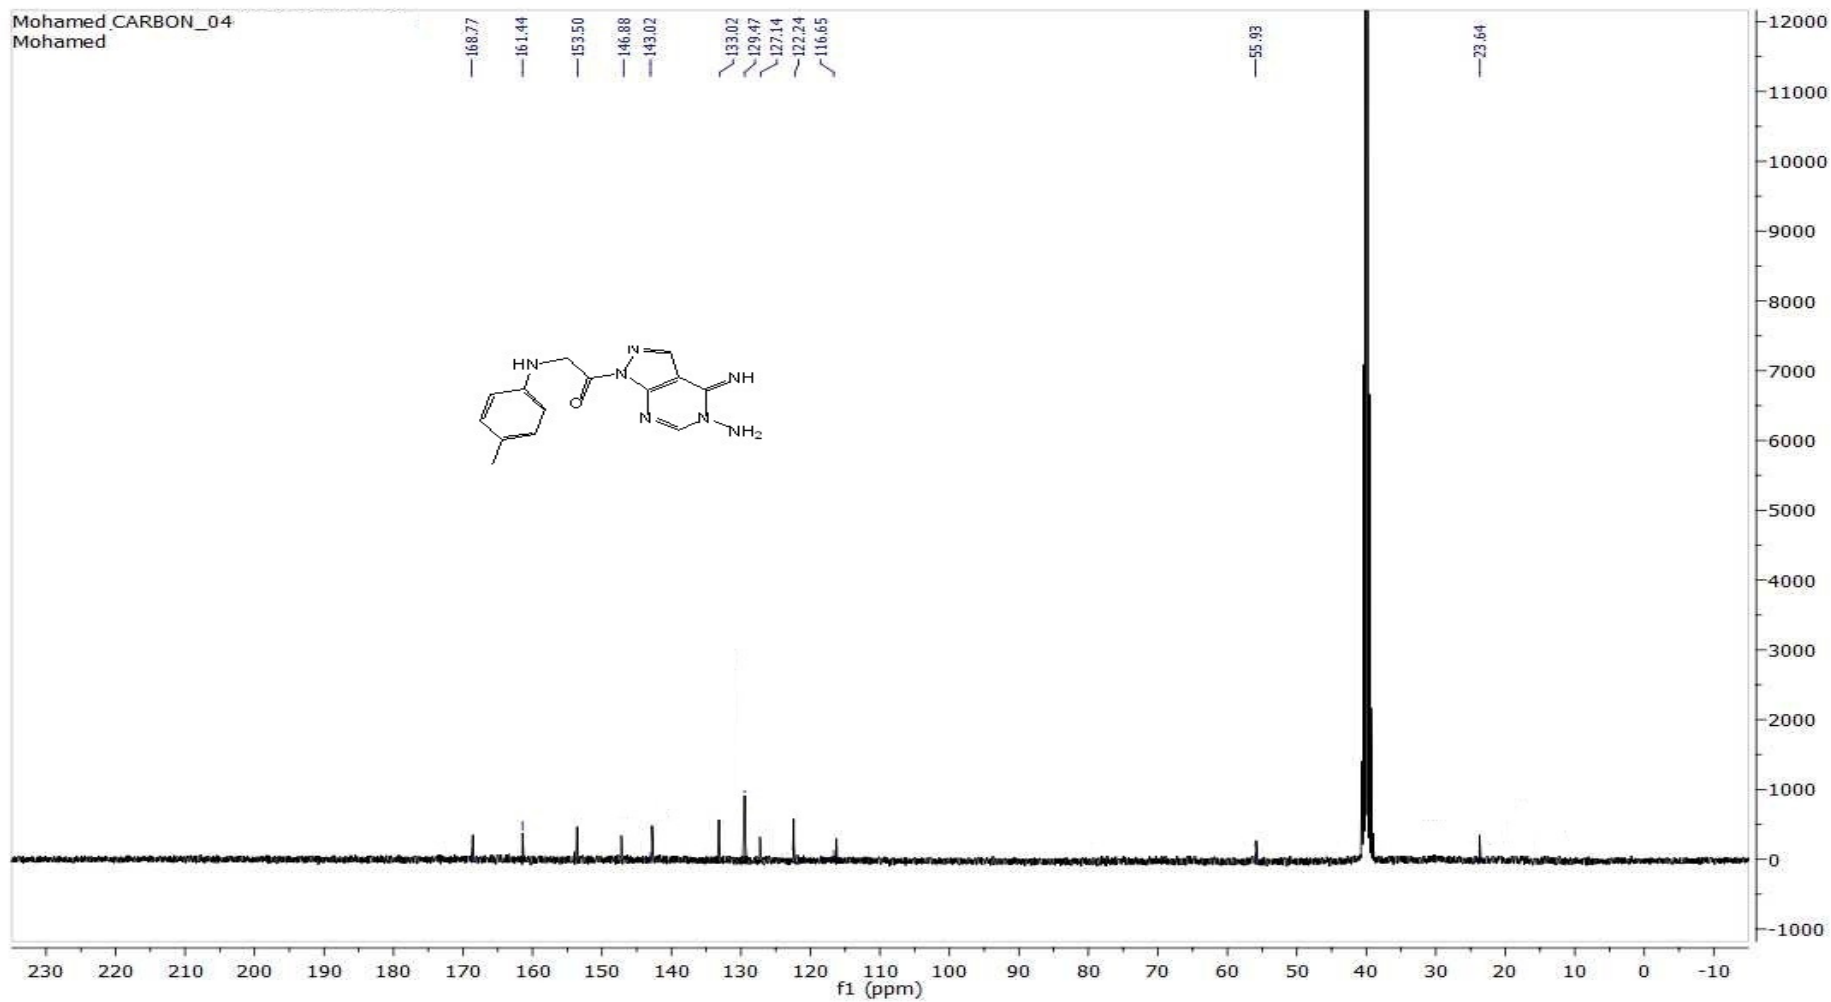

C<sup>13</sup>-NMR FOR COMP. 4

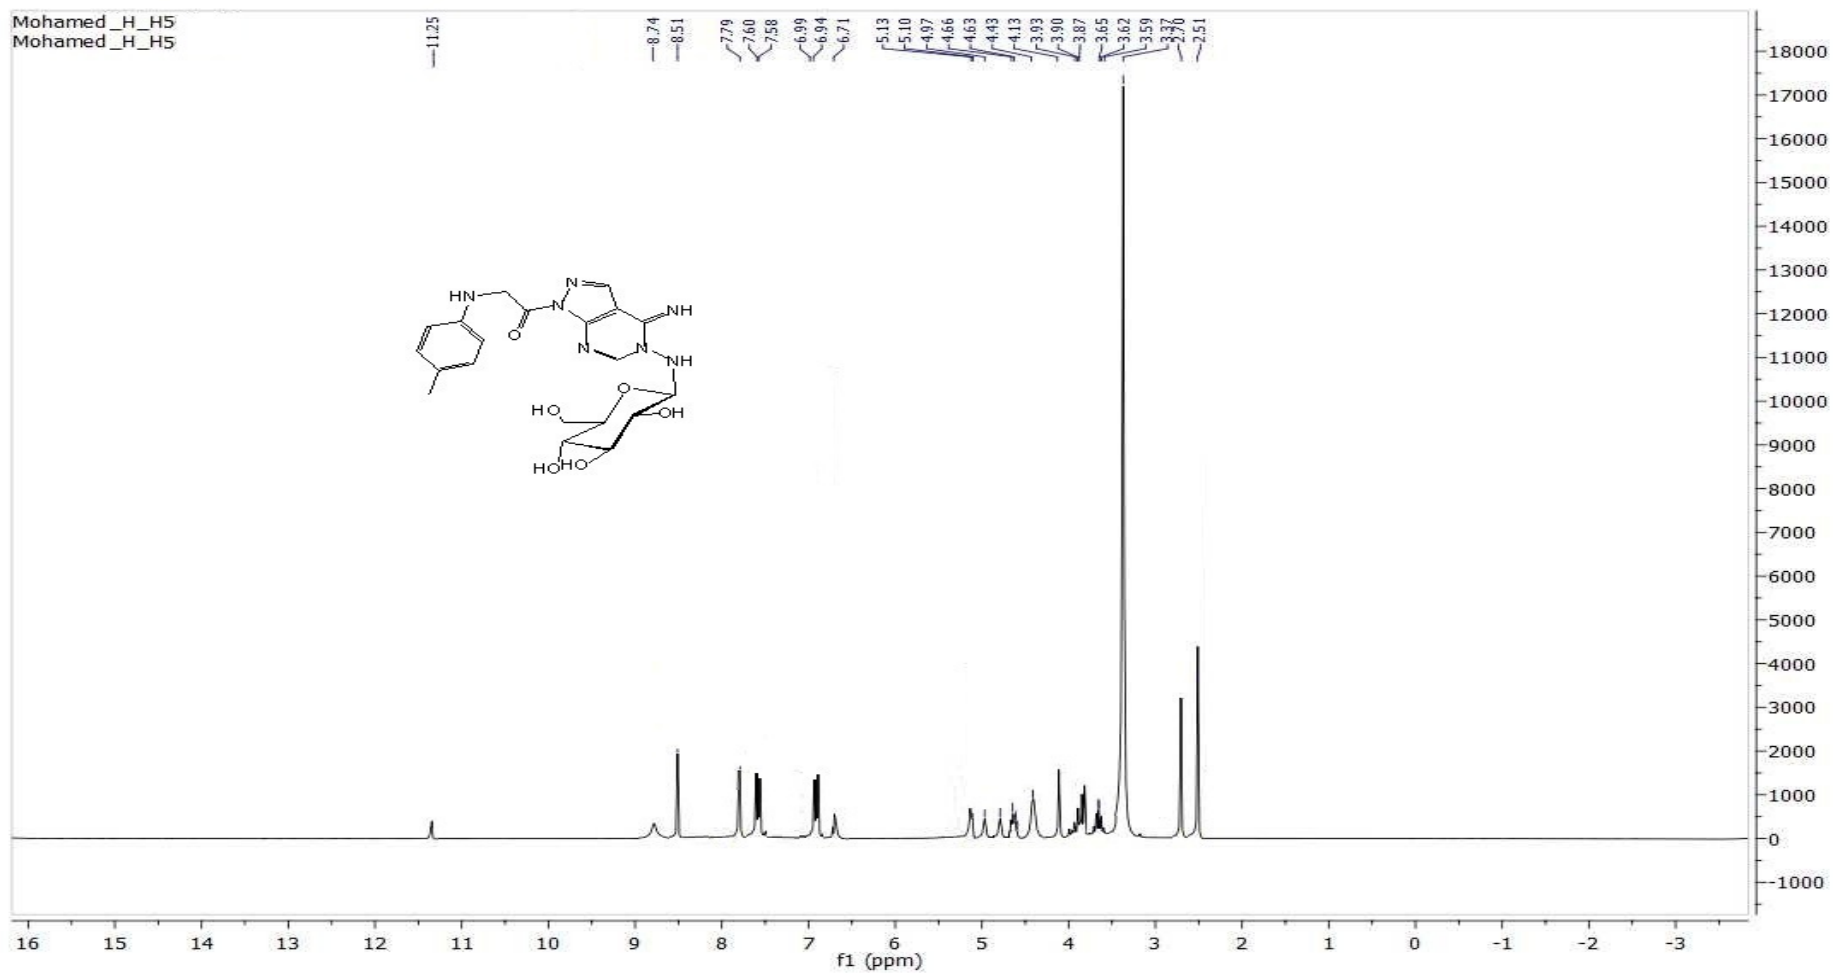

$^1\text{H-NMR}$  FOR COMP. 5

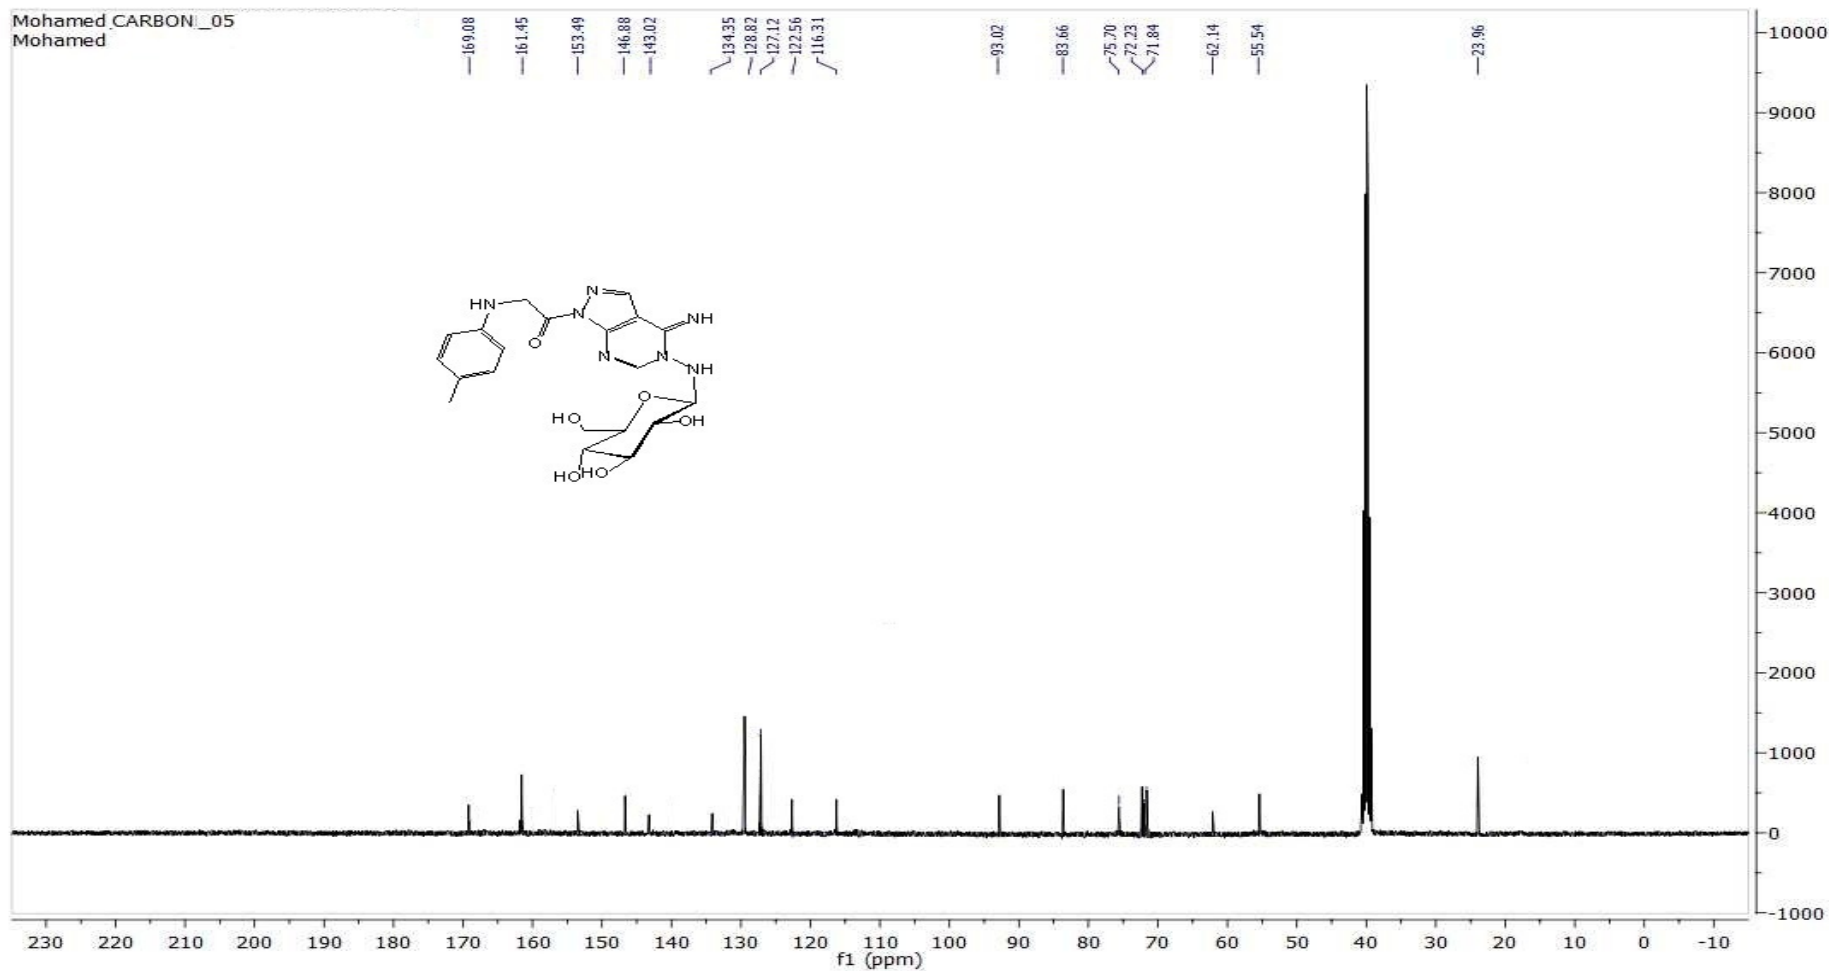

$C^{13}$ -NMR FOR COMP. 5

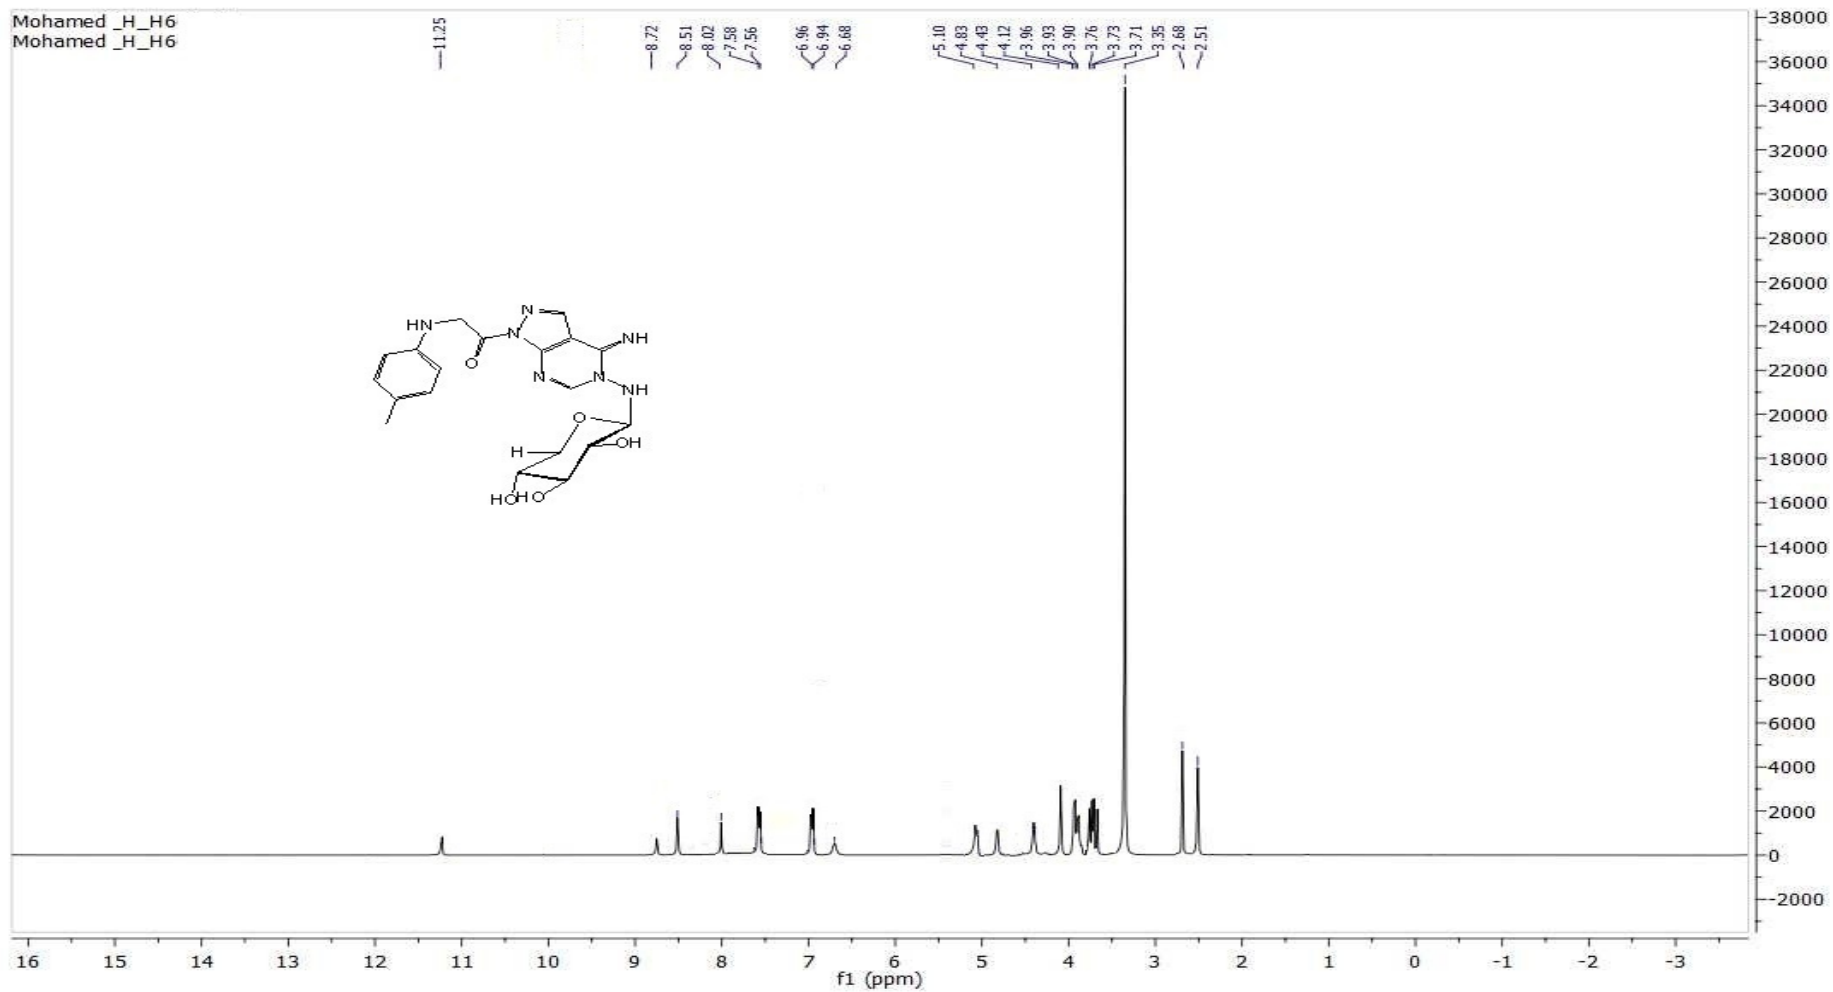

$^1\text{H-NMR}$  FOR COMP. 6

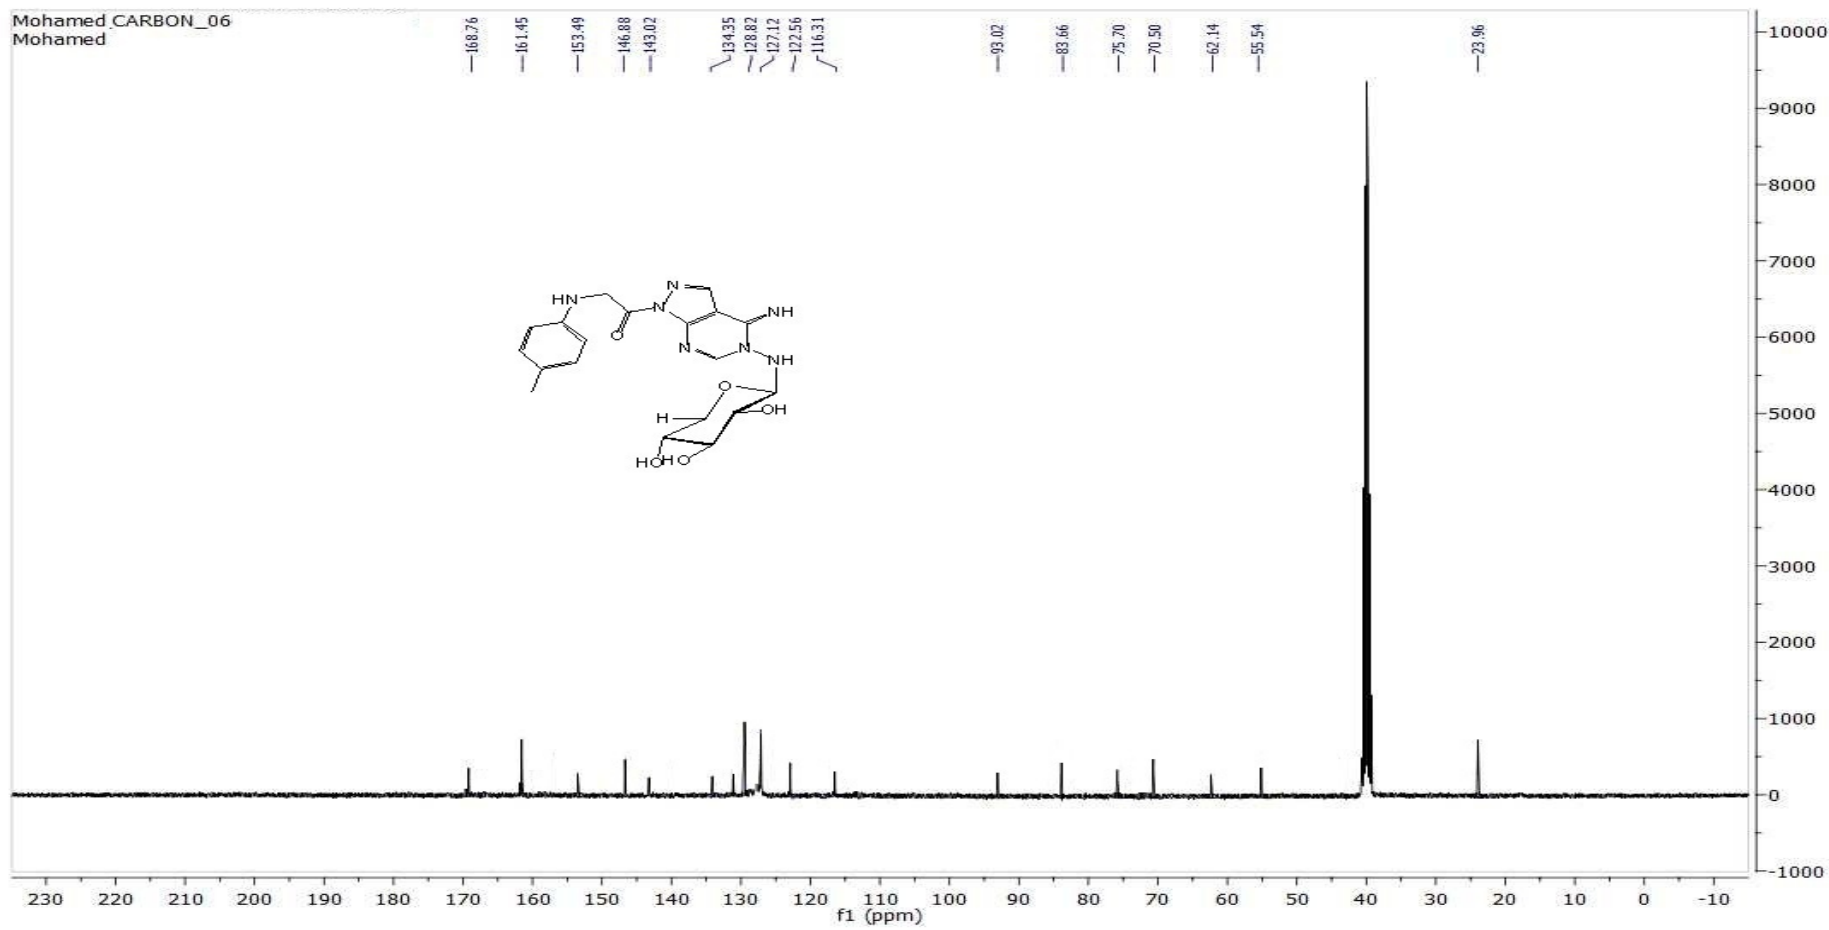

$C^{13}$ -NMR FOR COMP. 6

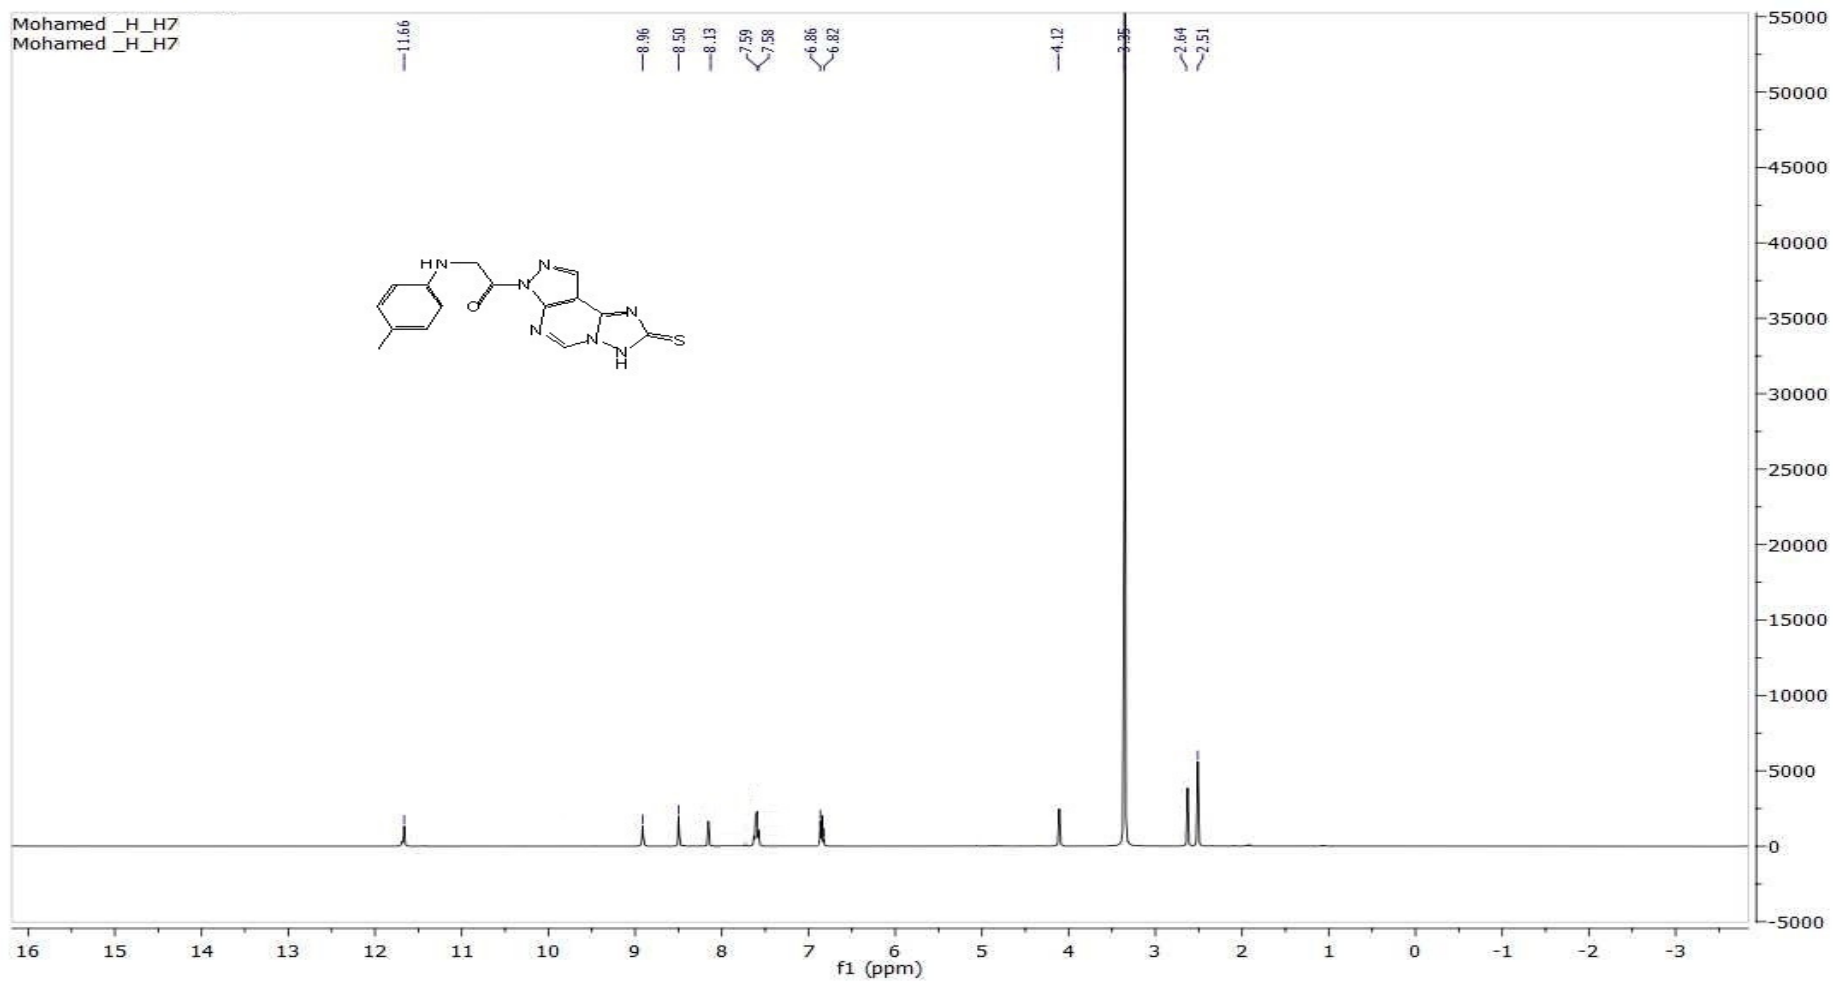

<sup>1</sup>H-NMR FOR COMP. 7

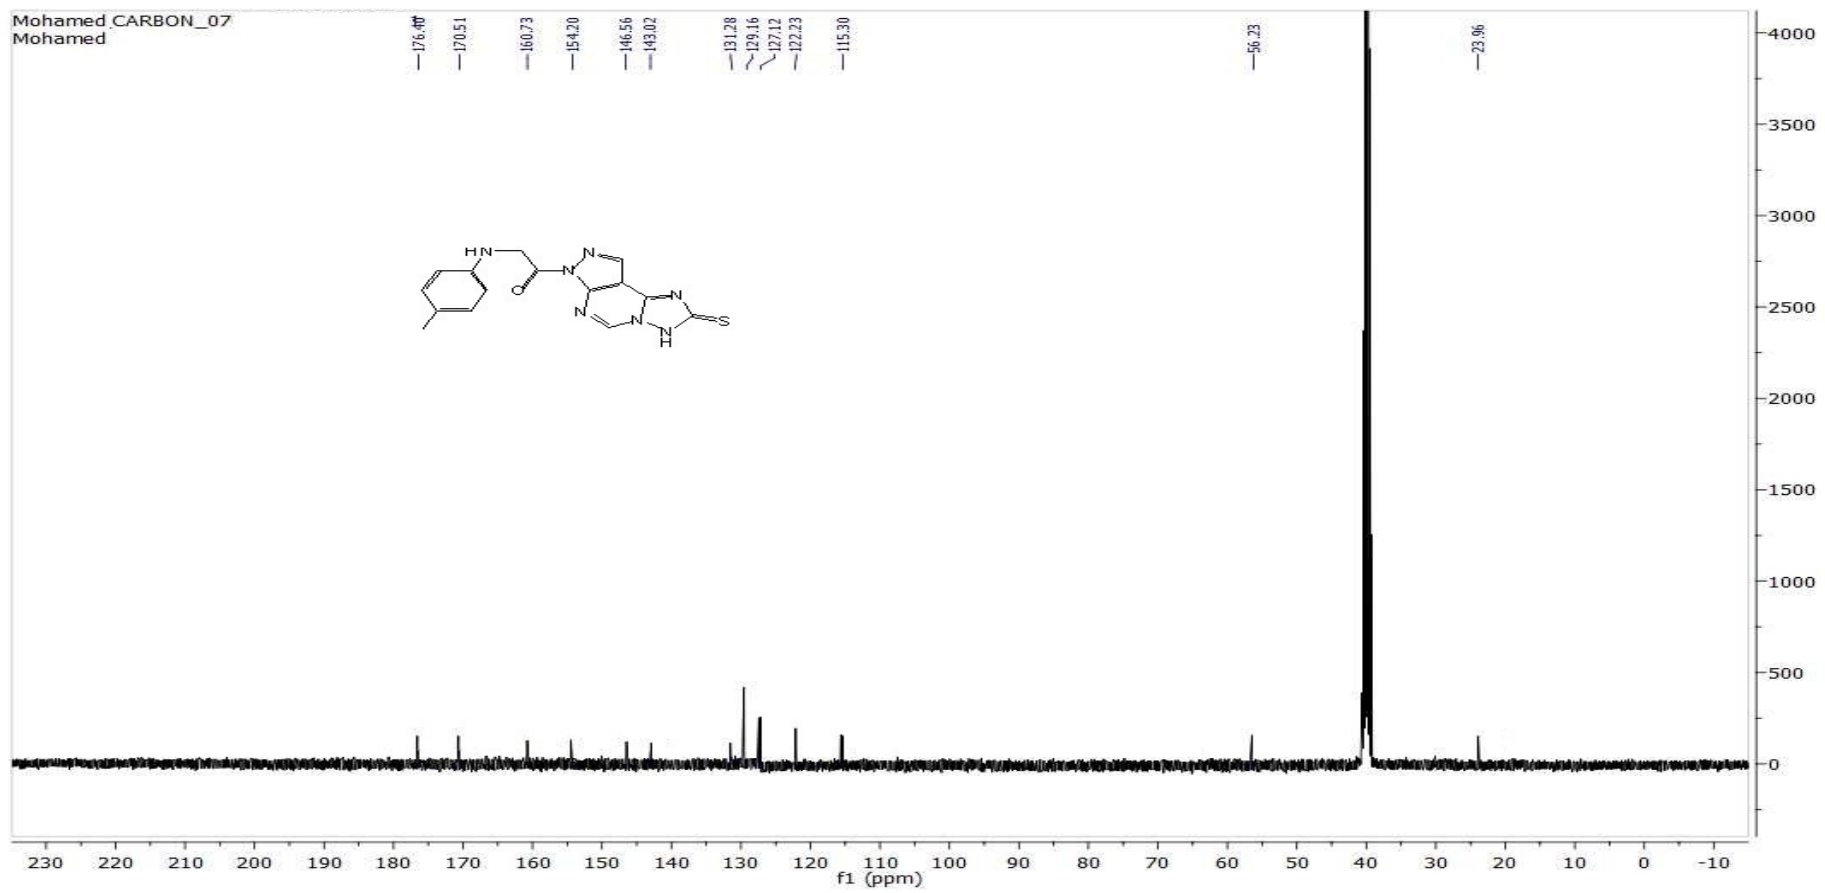

C<sup>13</sup>-NMR FOR COMP. 7



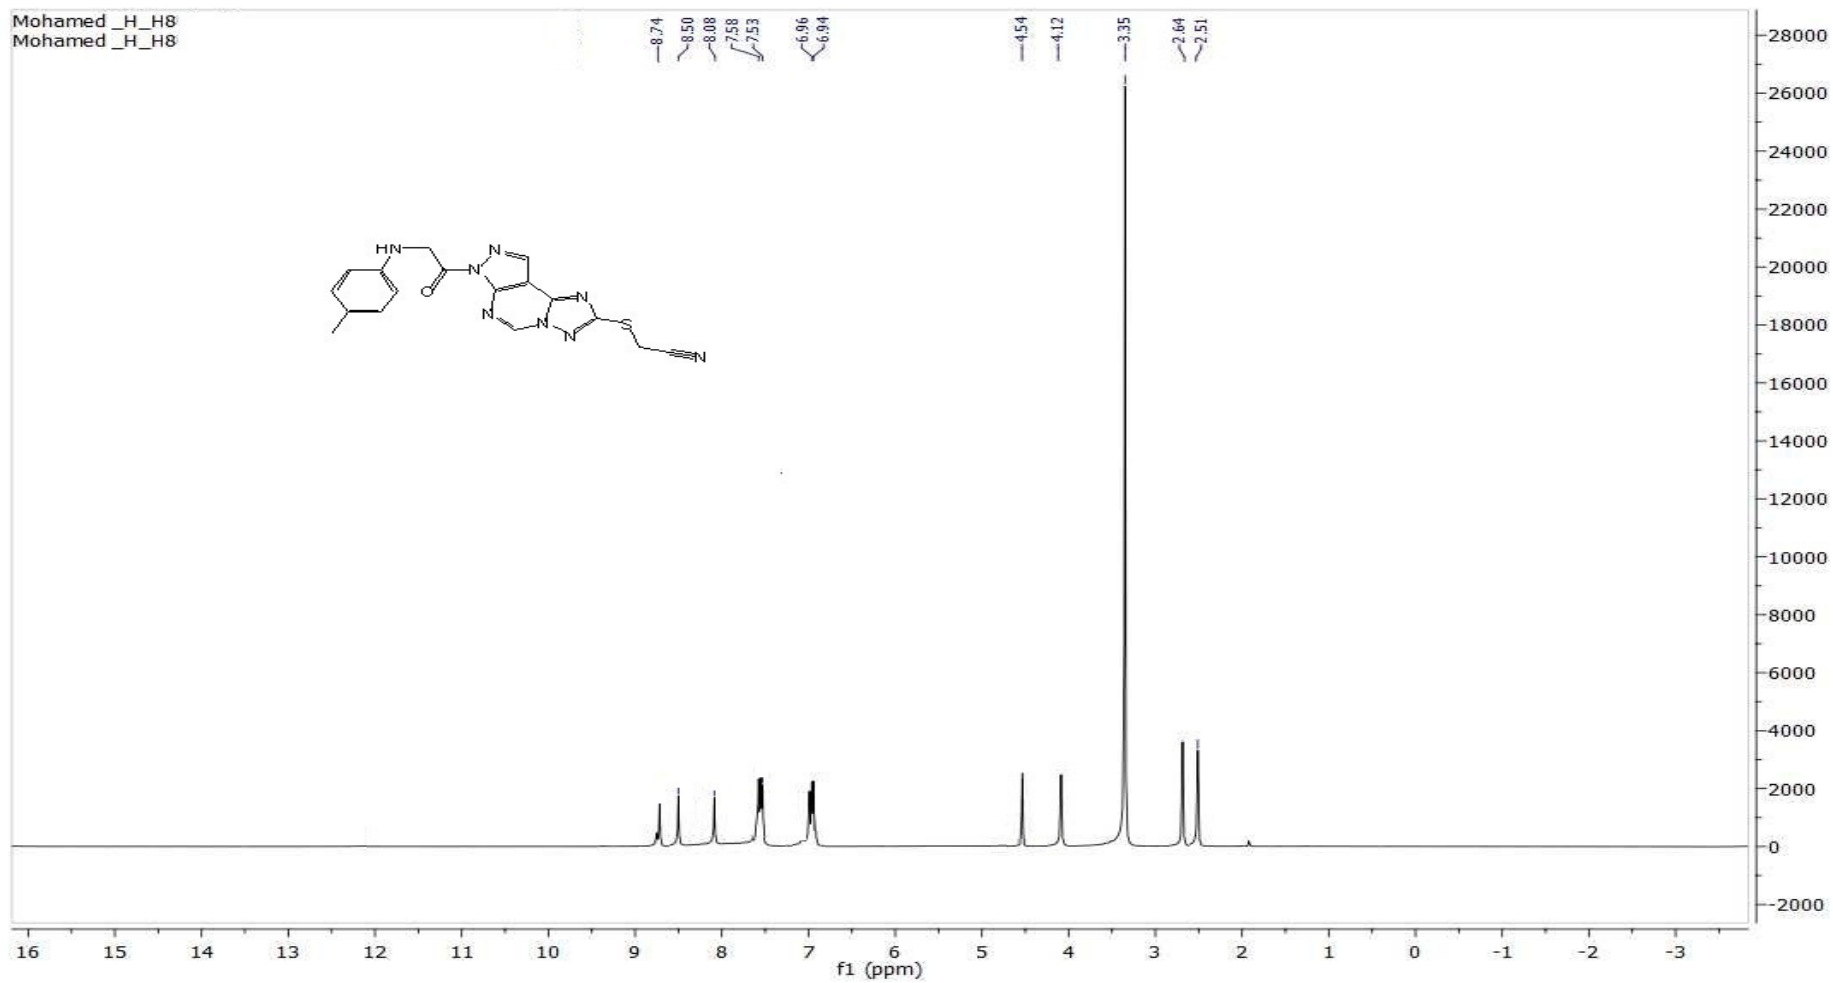

<sup>1</sup>H-NMR FOR COMP. 8

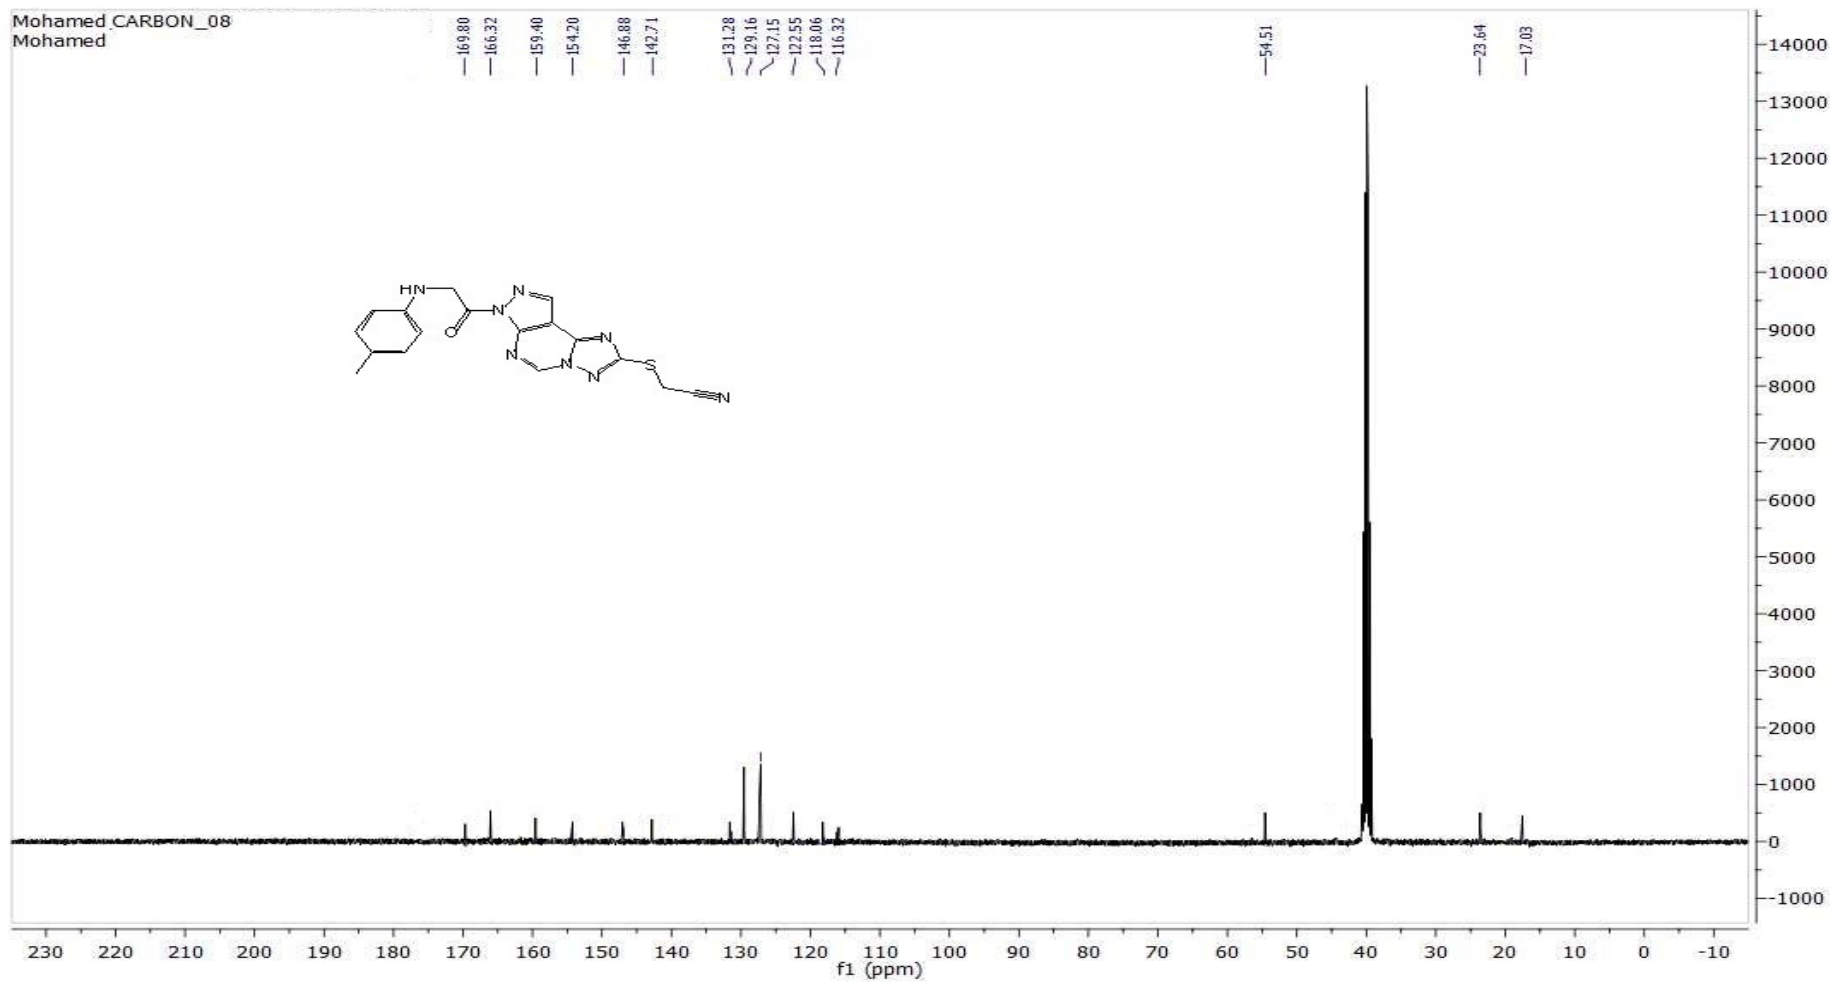

$C^{13}$ -NMR FOR COMP. 8

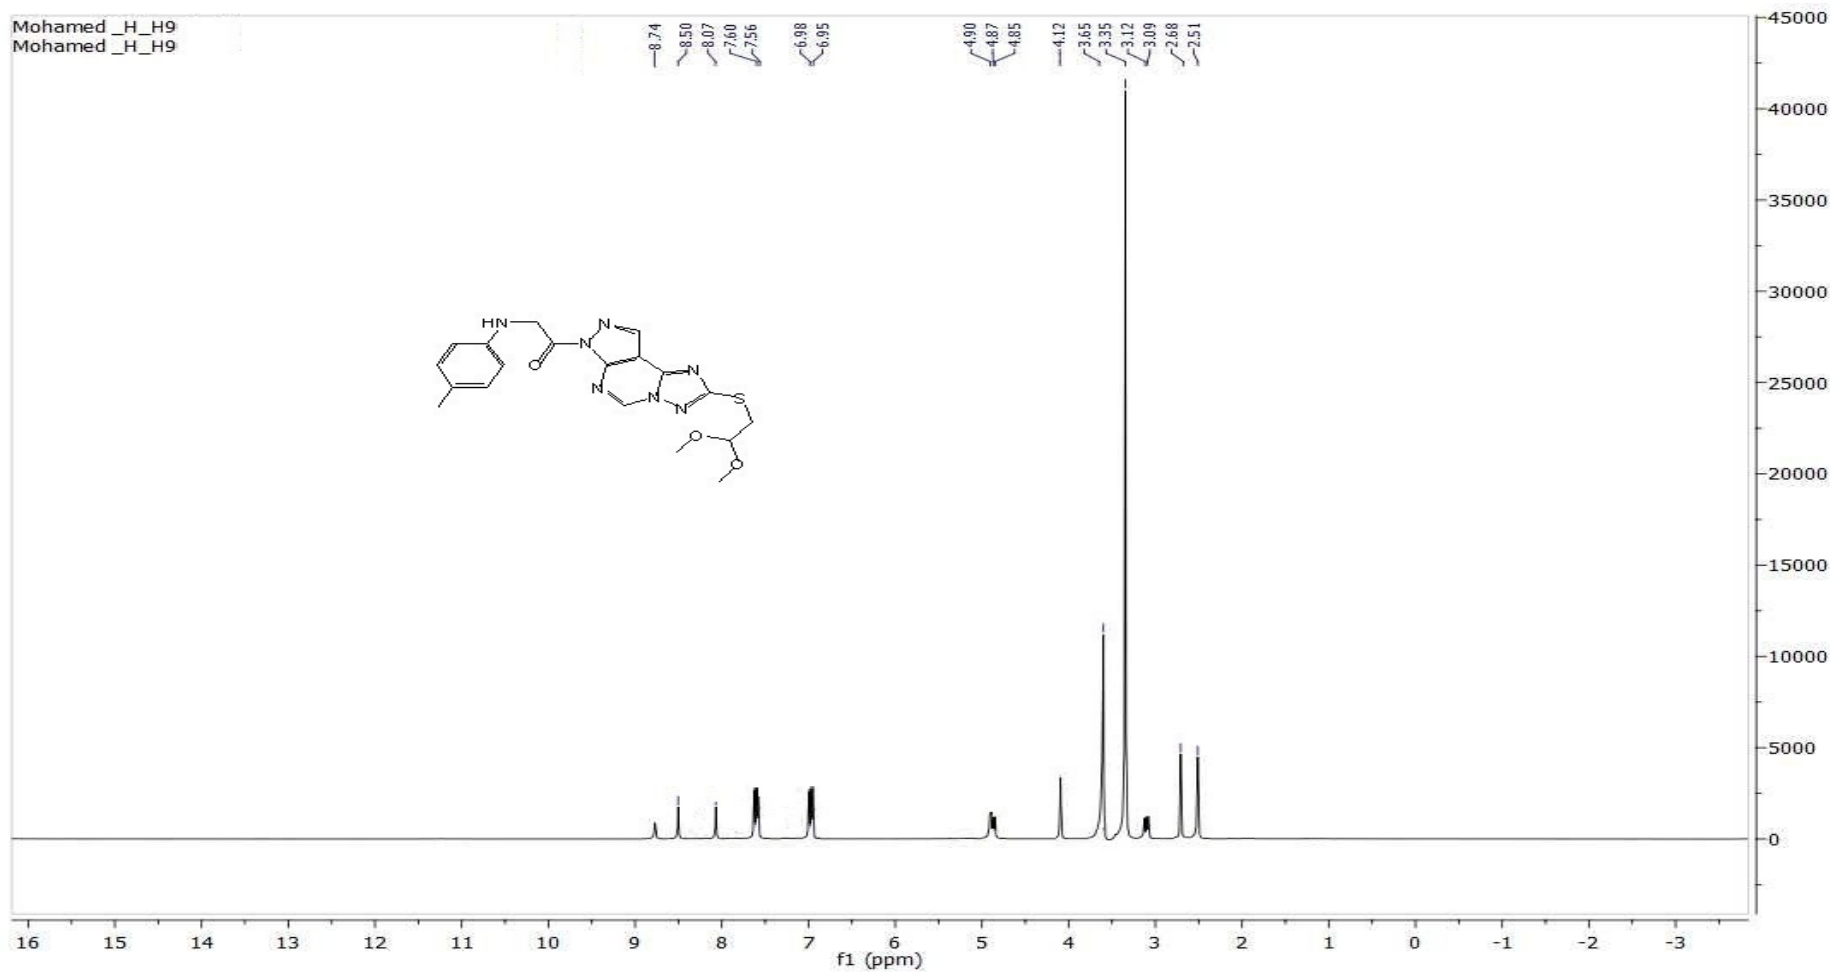

<sup>1</sup>H-NMR FOR COMP. 9

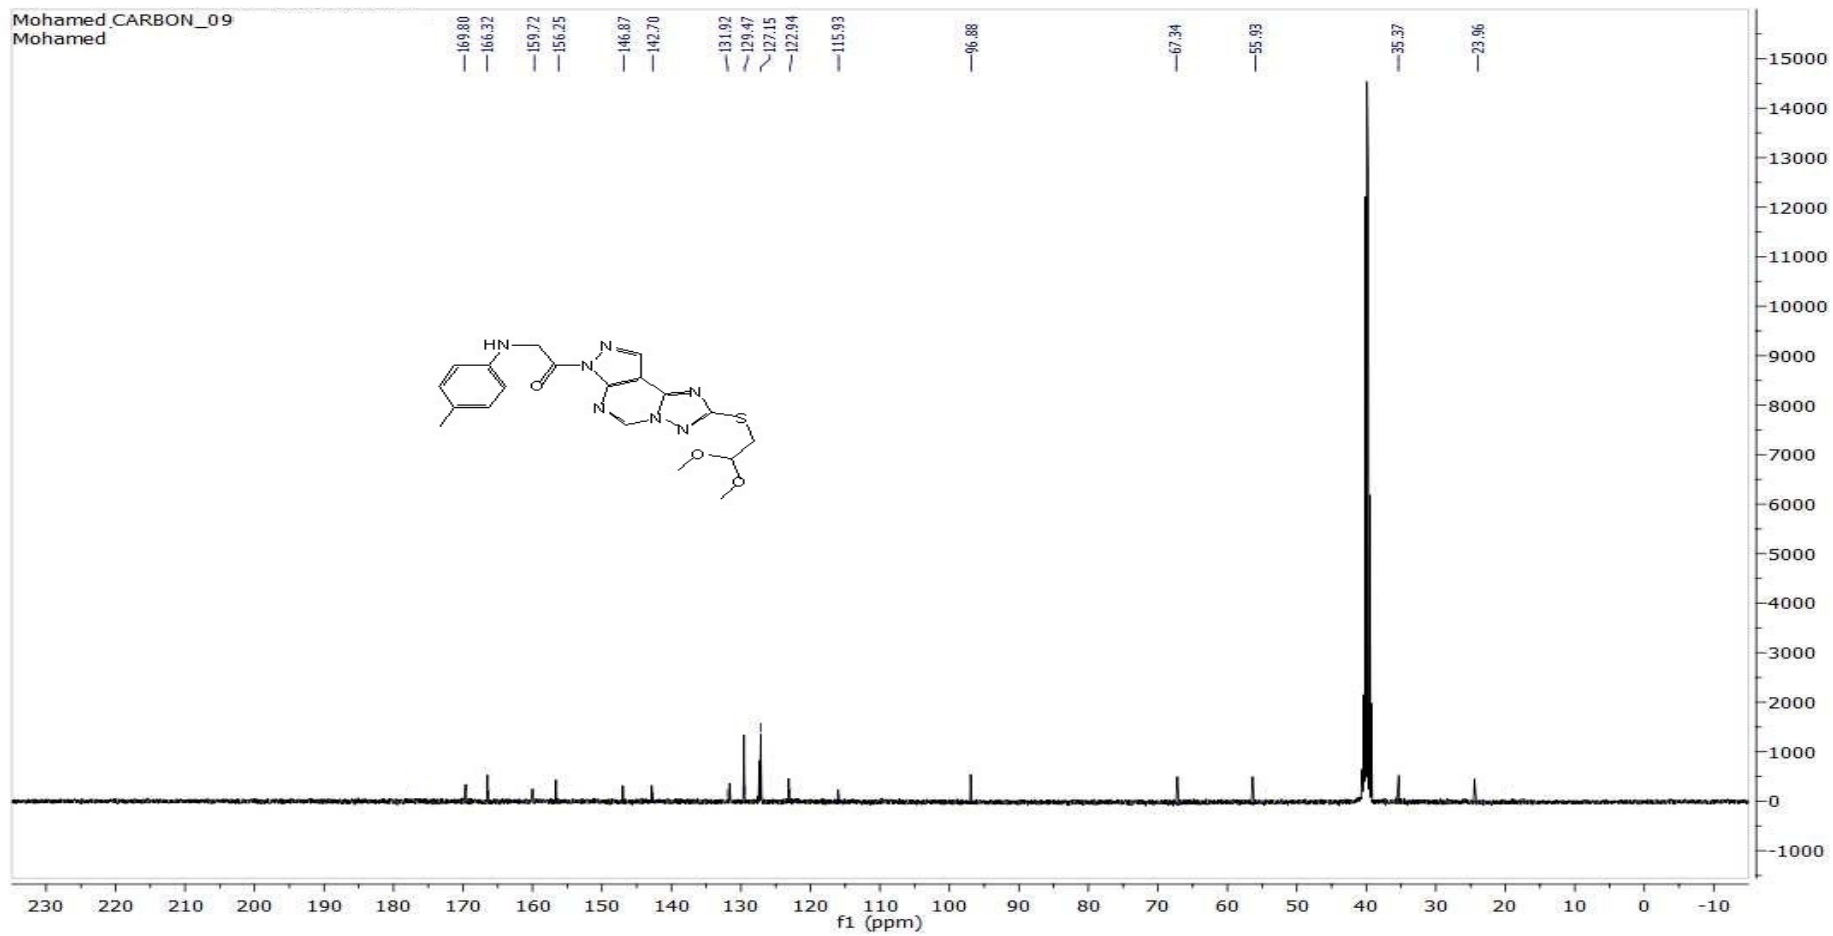

C<sup>13</sup>-NMR FOR COMP. 9

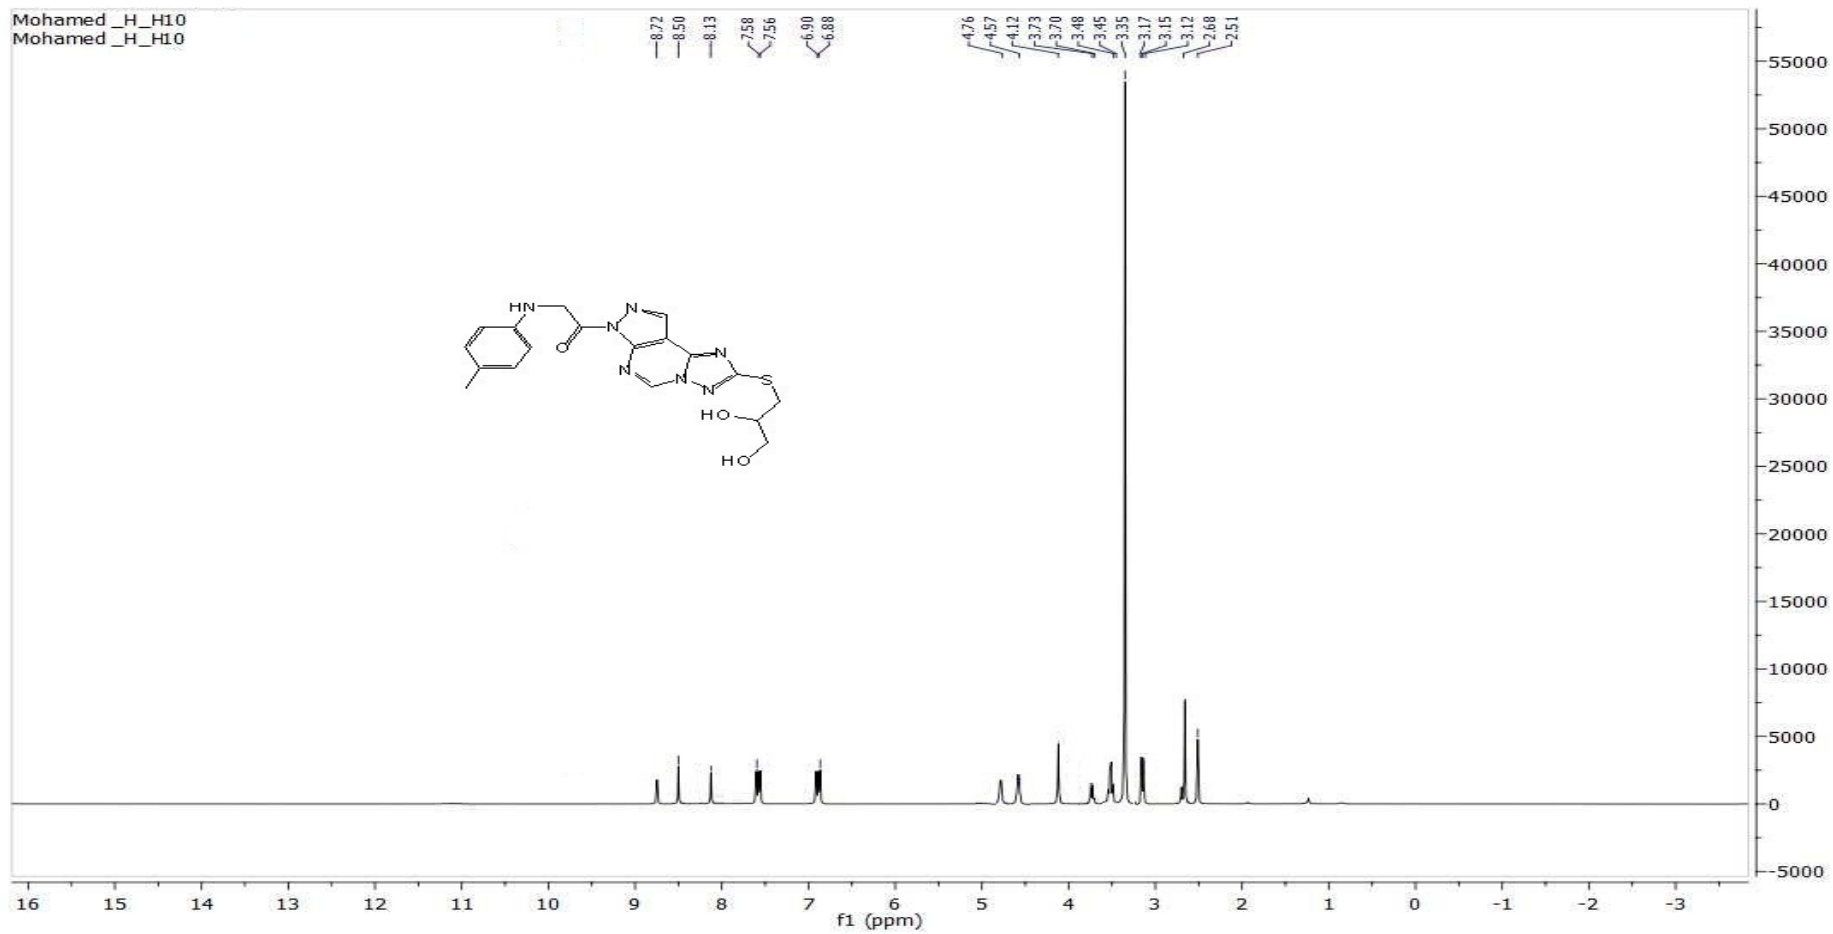

$^1\text{H-NMR}$  FOR COMP. 10

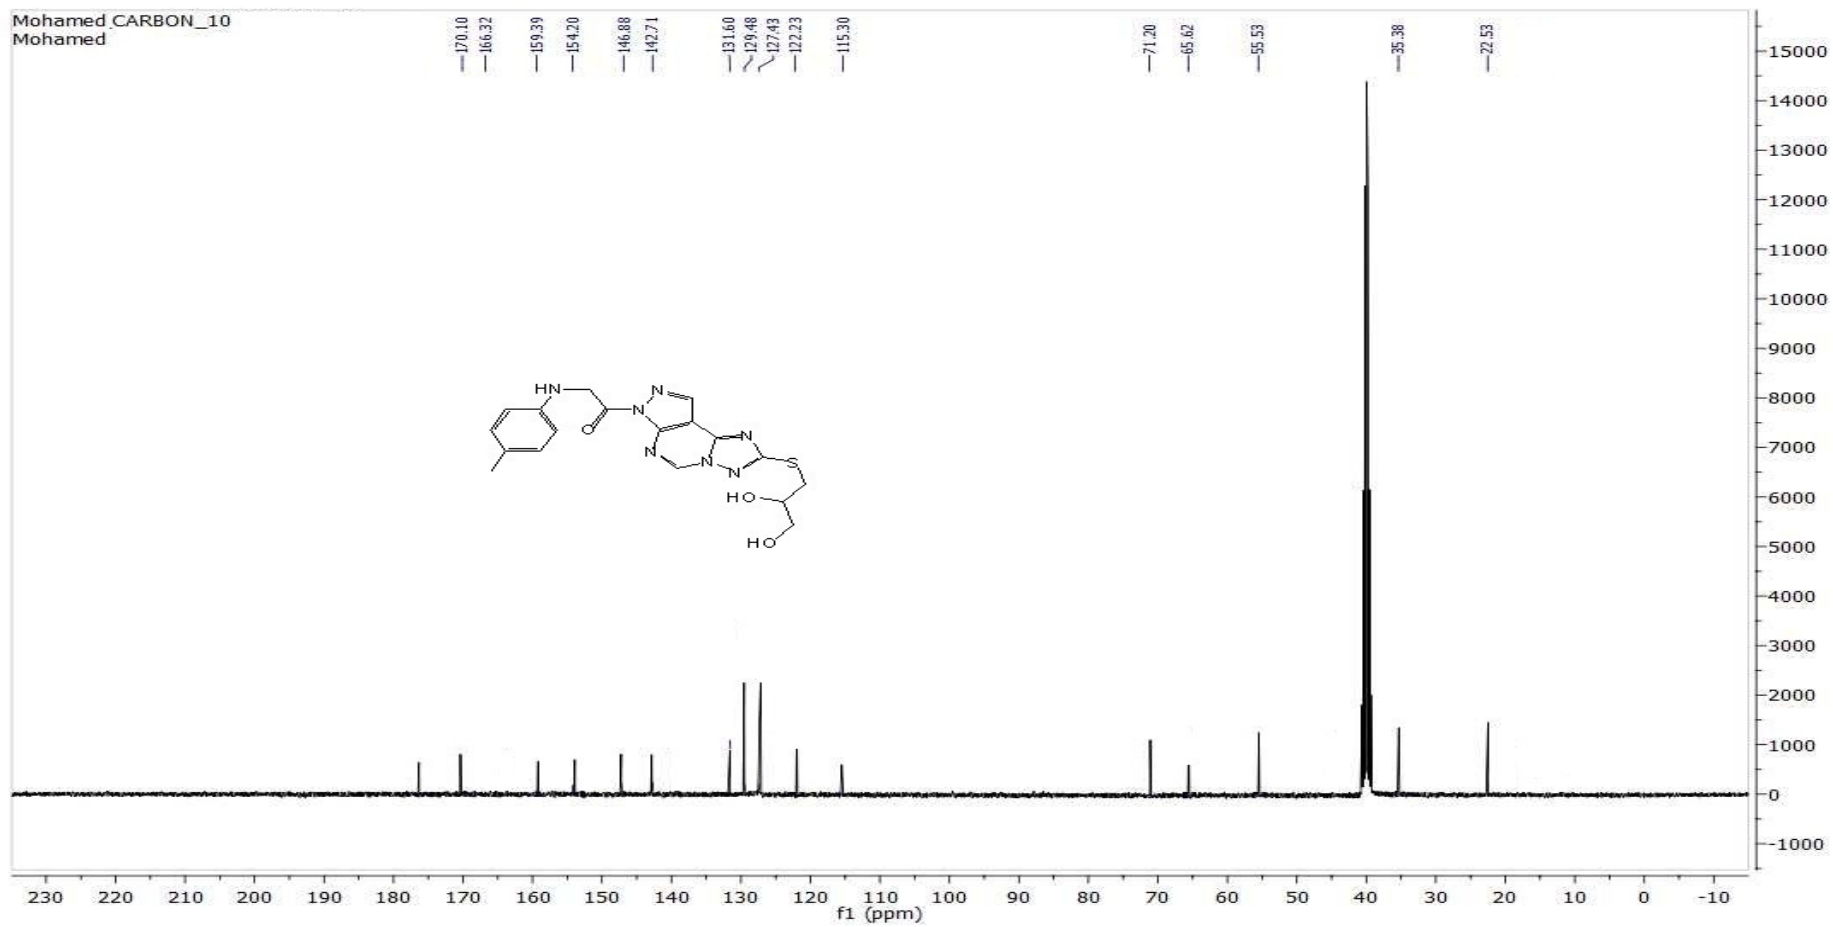

$C^{13}$ -NMR FOR COMP. 10

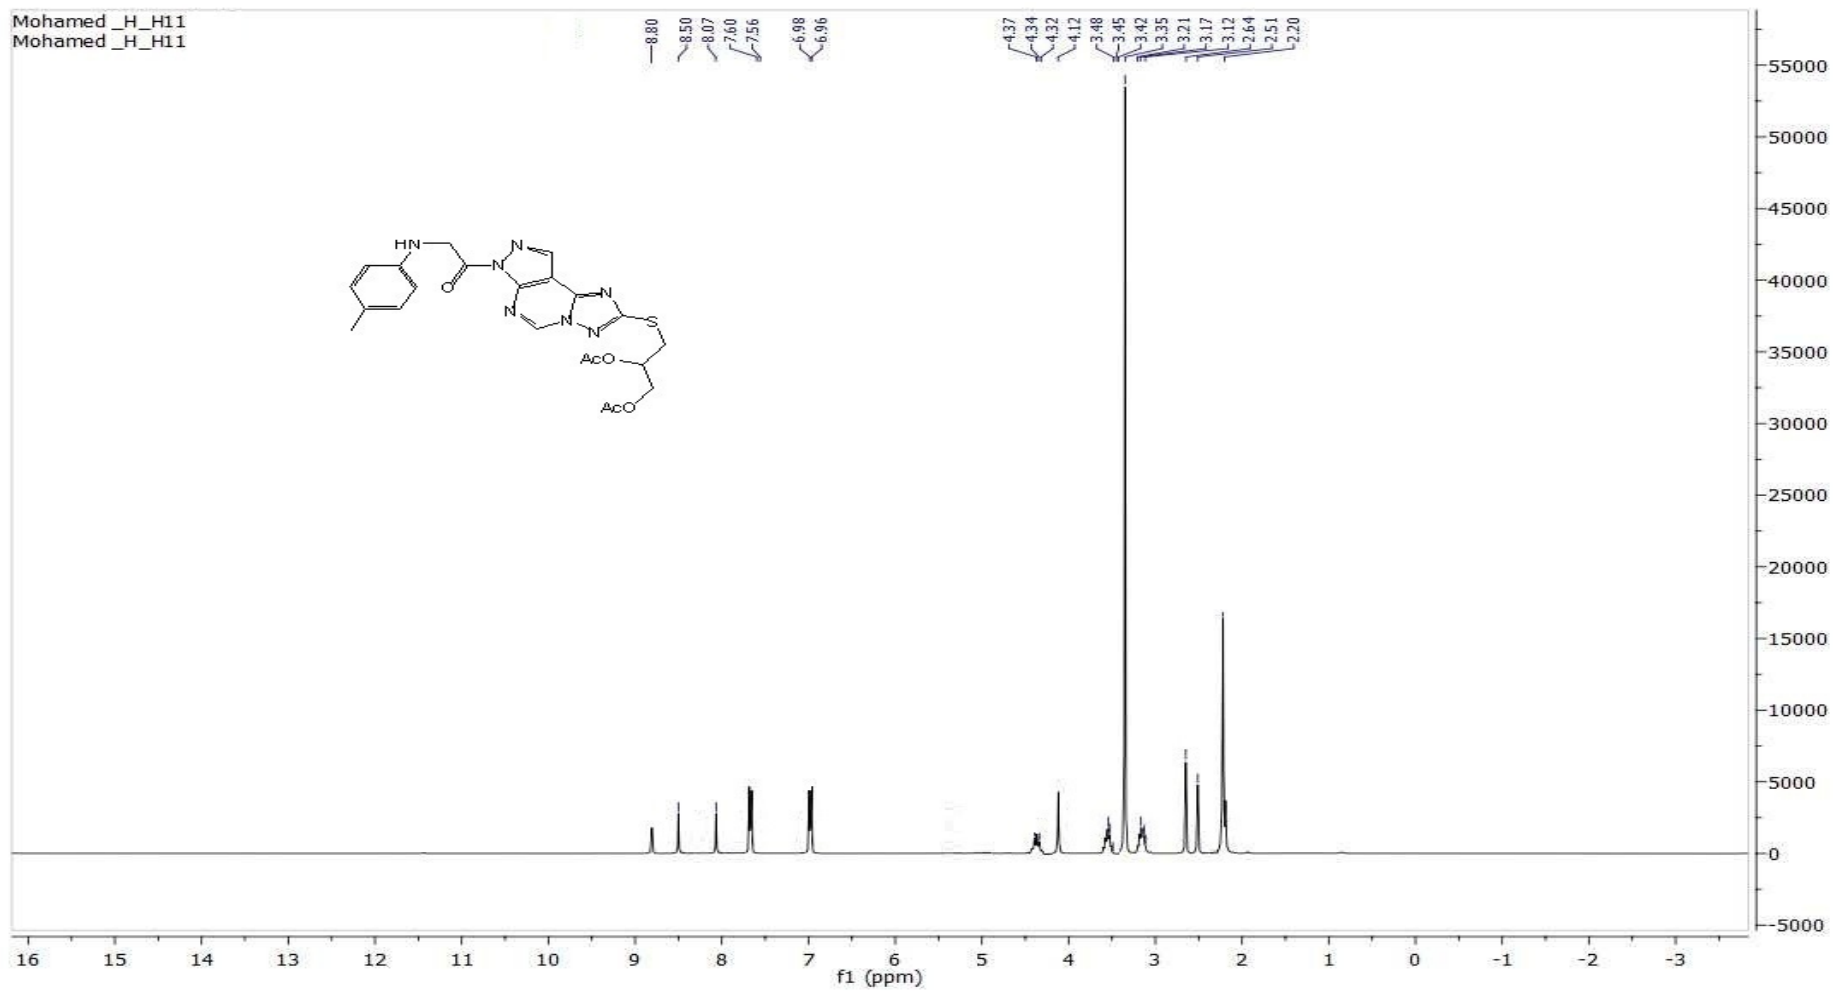

$^1\text{H-NMR}$  FOR COMP. 11

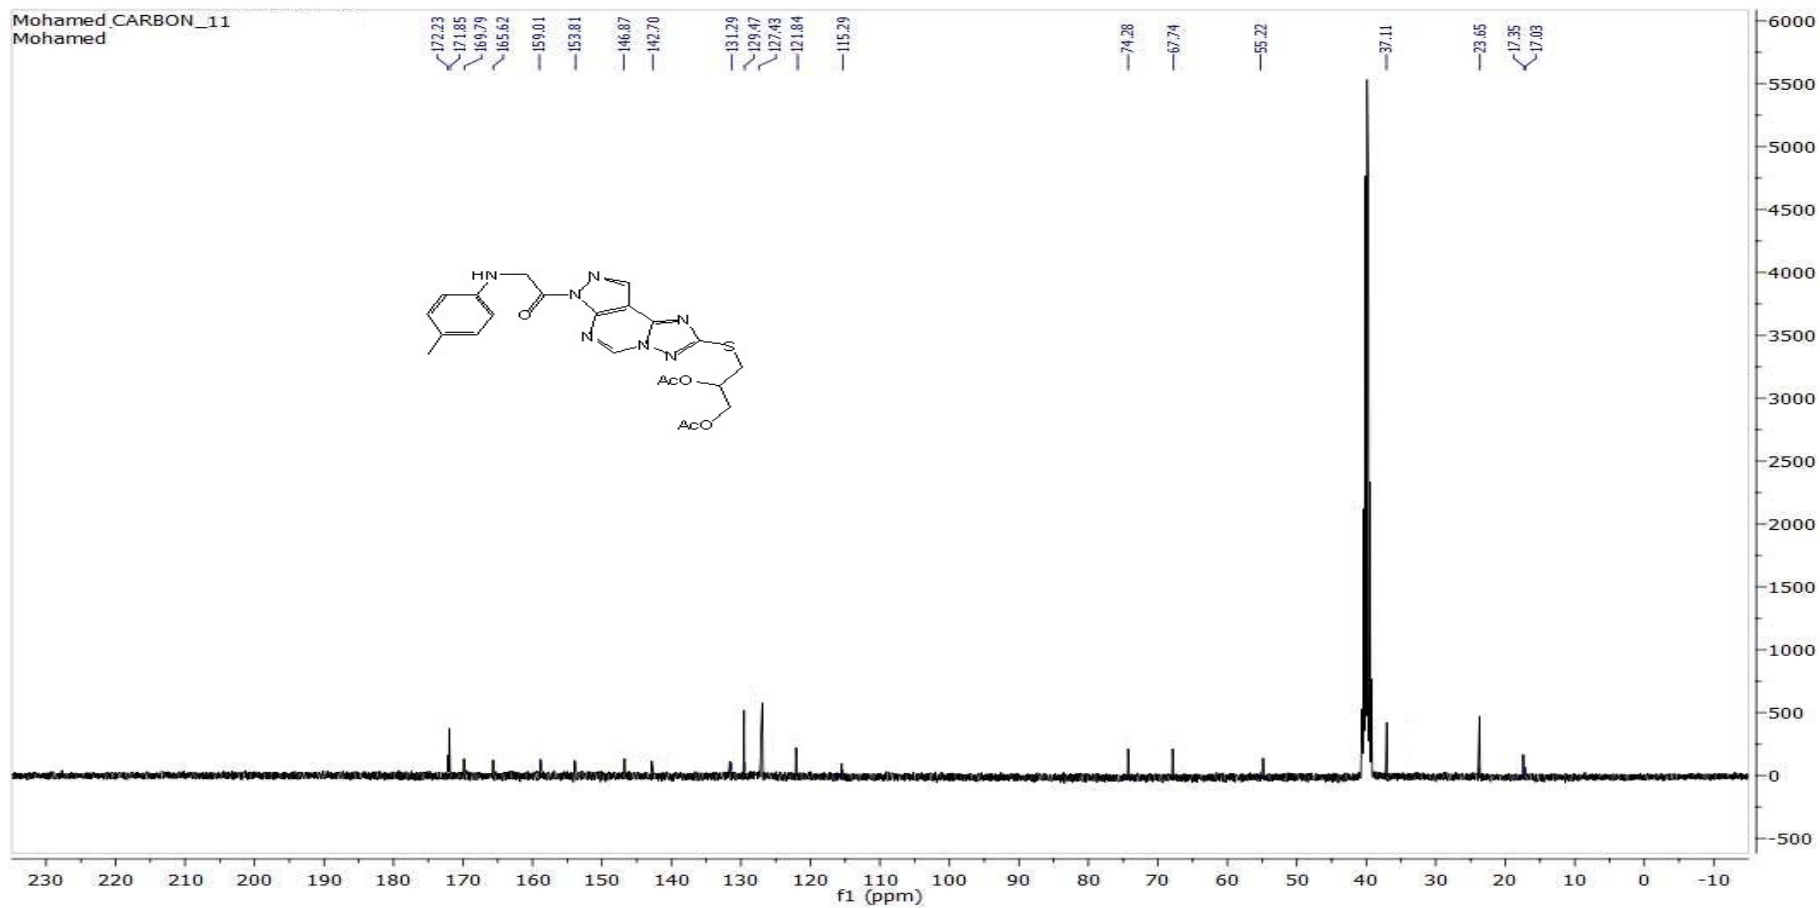

C<sup>13</sup>-NMR FOR COMP. 11



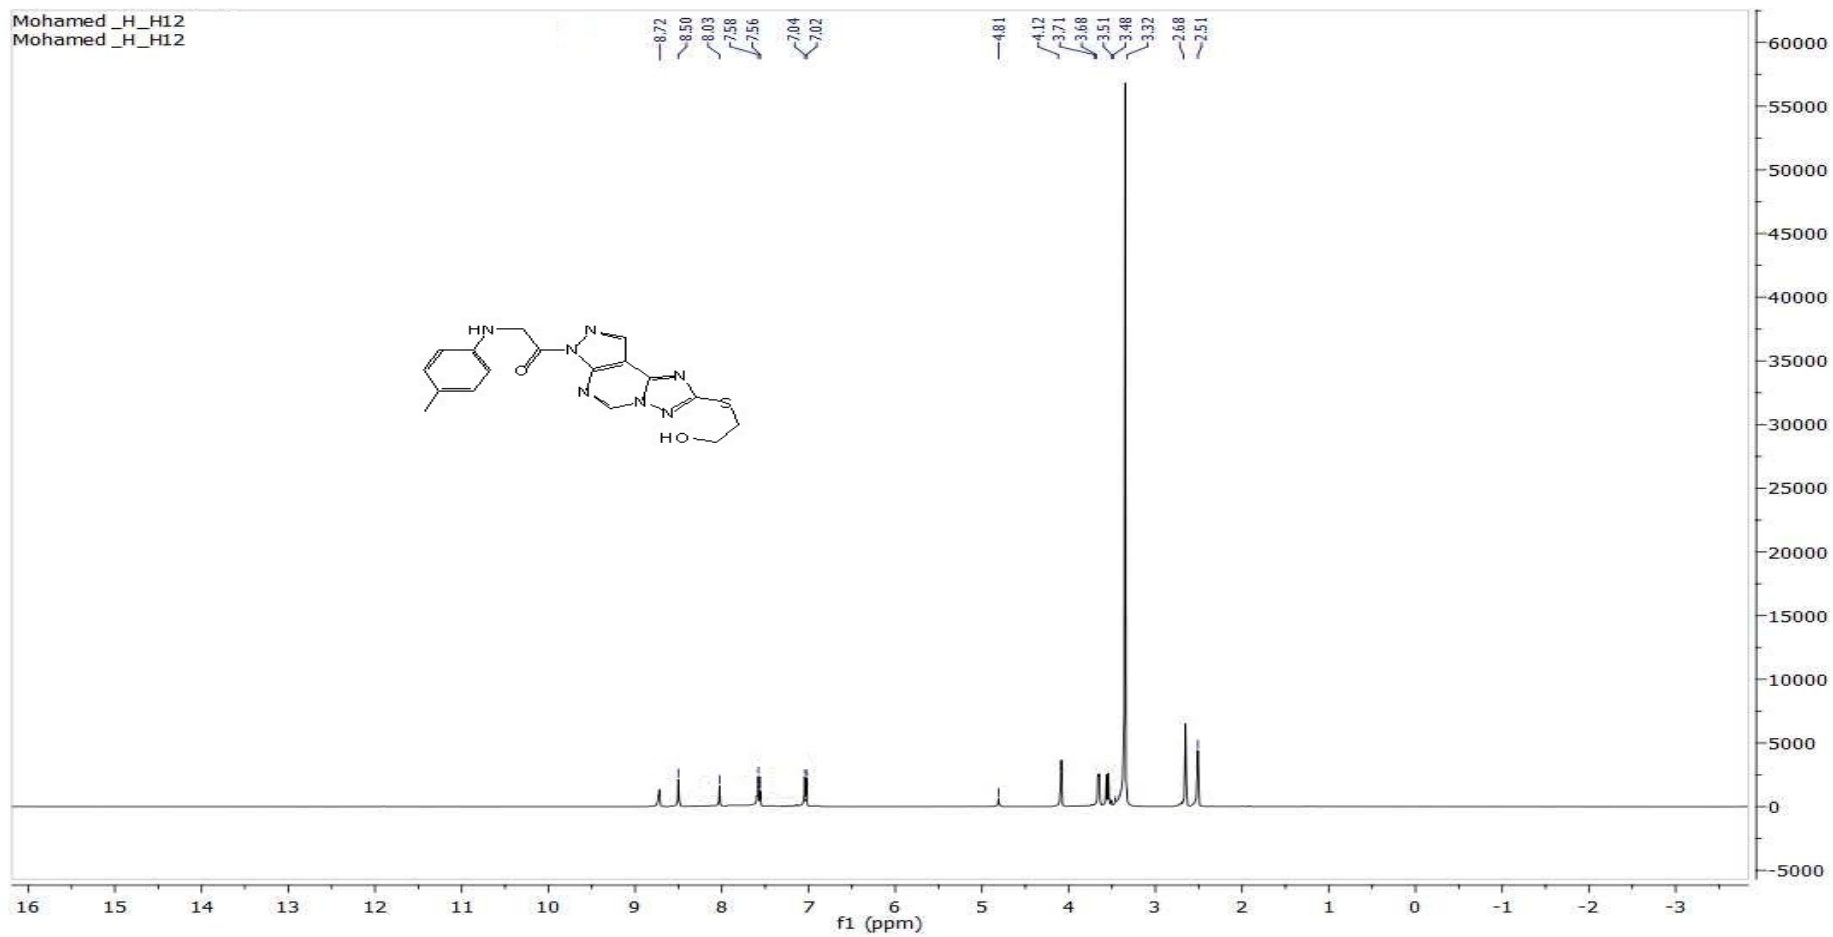

$^1\text{H-NMR}$  FOR COMP. 12

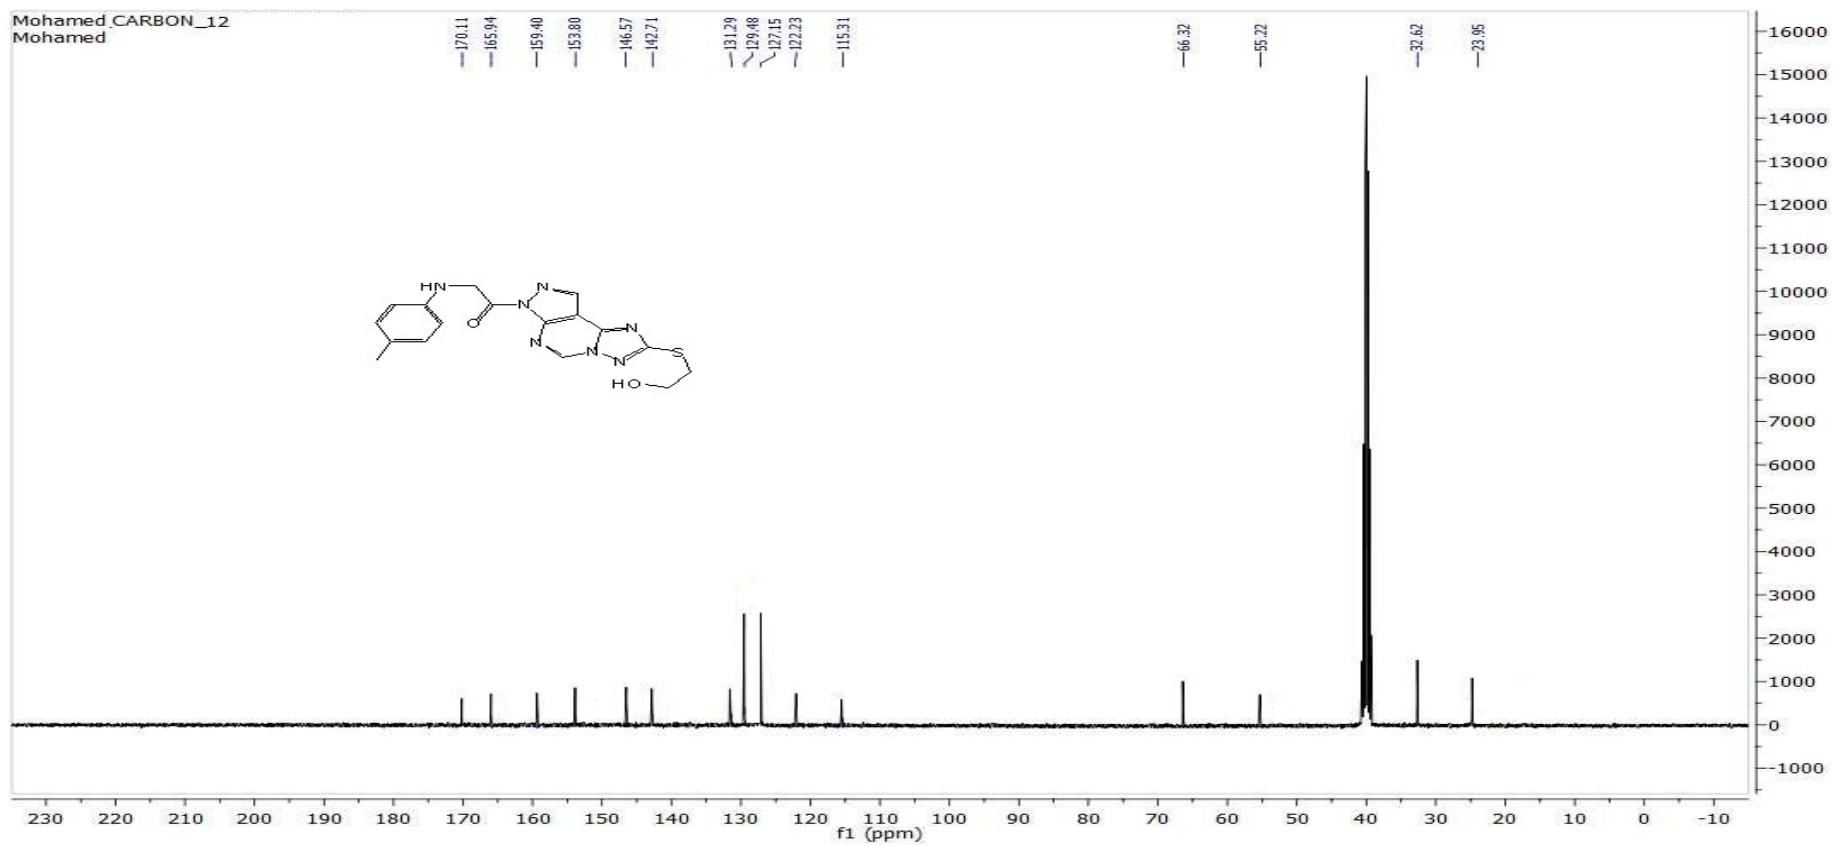

$C^{13}$ -NMR FOR COMP. 12

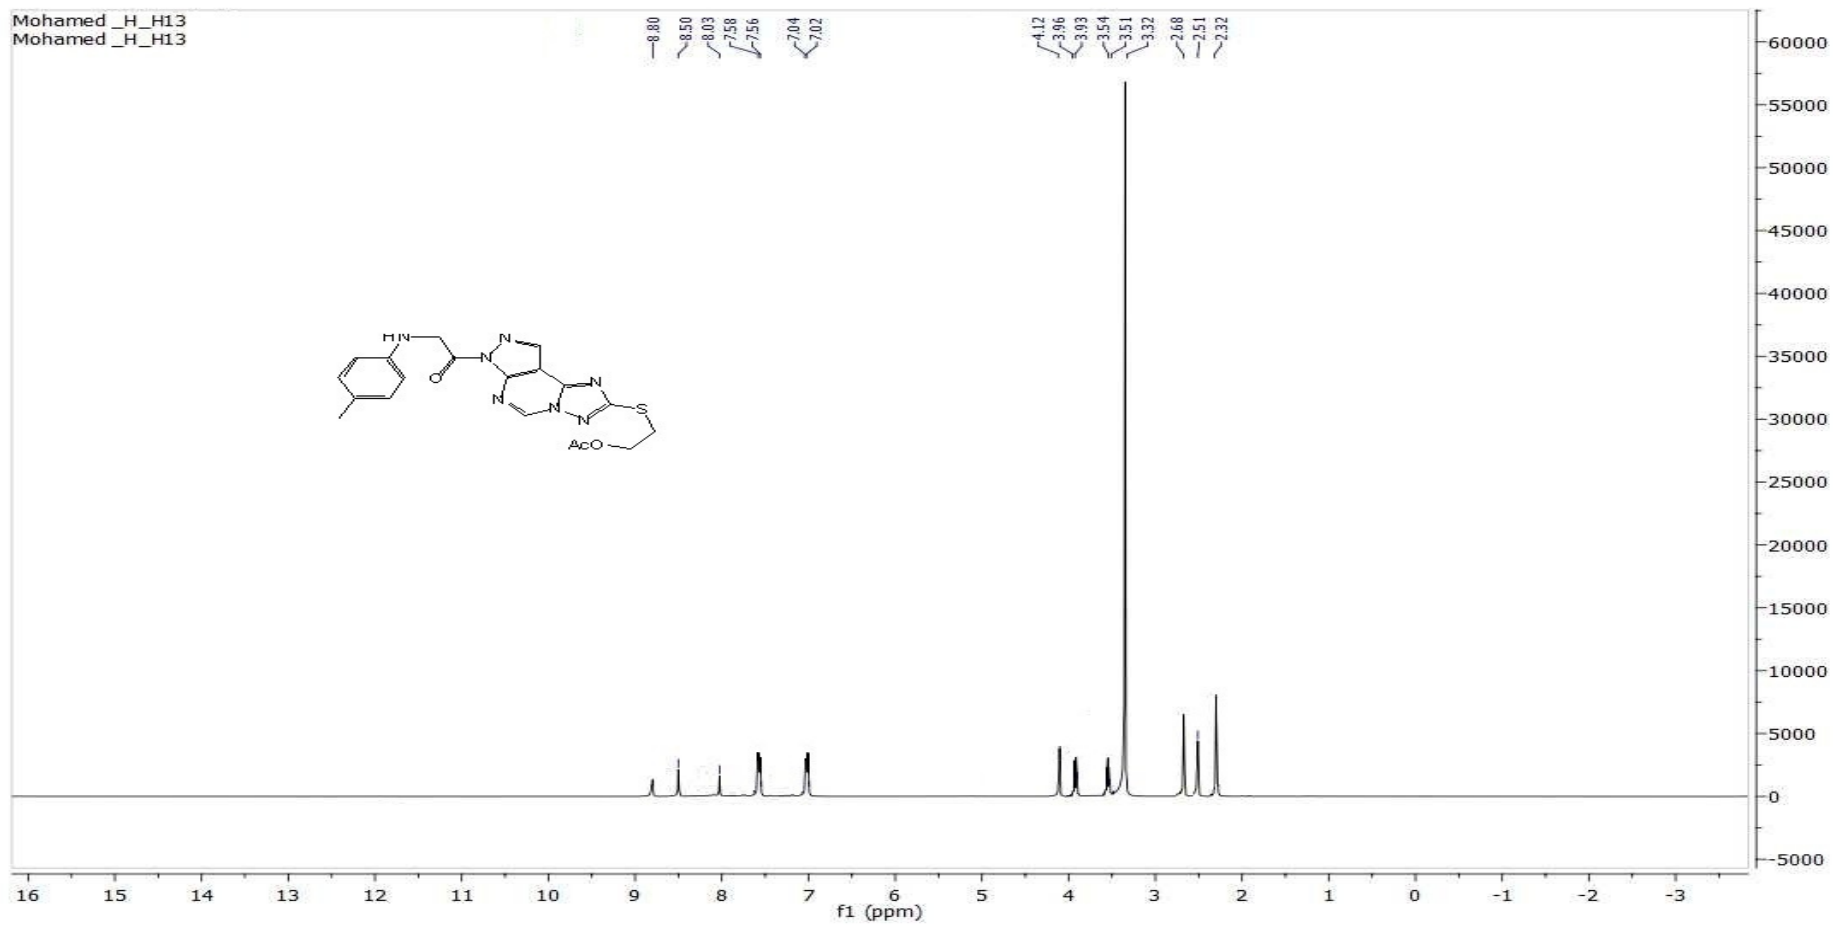

<sup>1</sup>H-NMR FOR COMP. 13

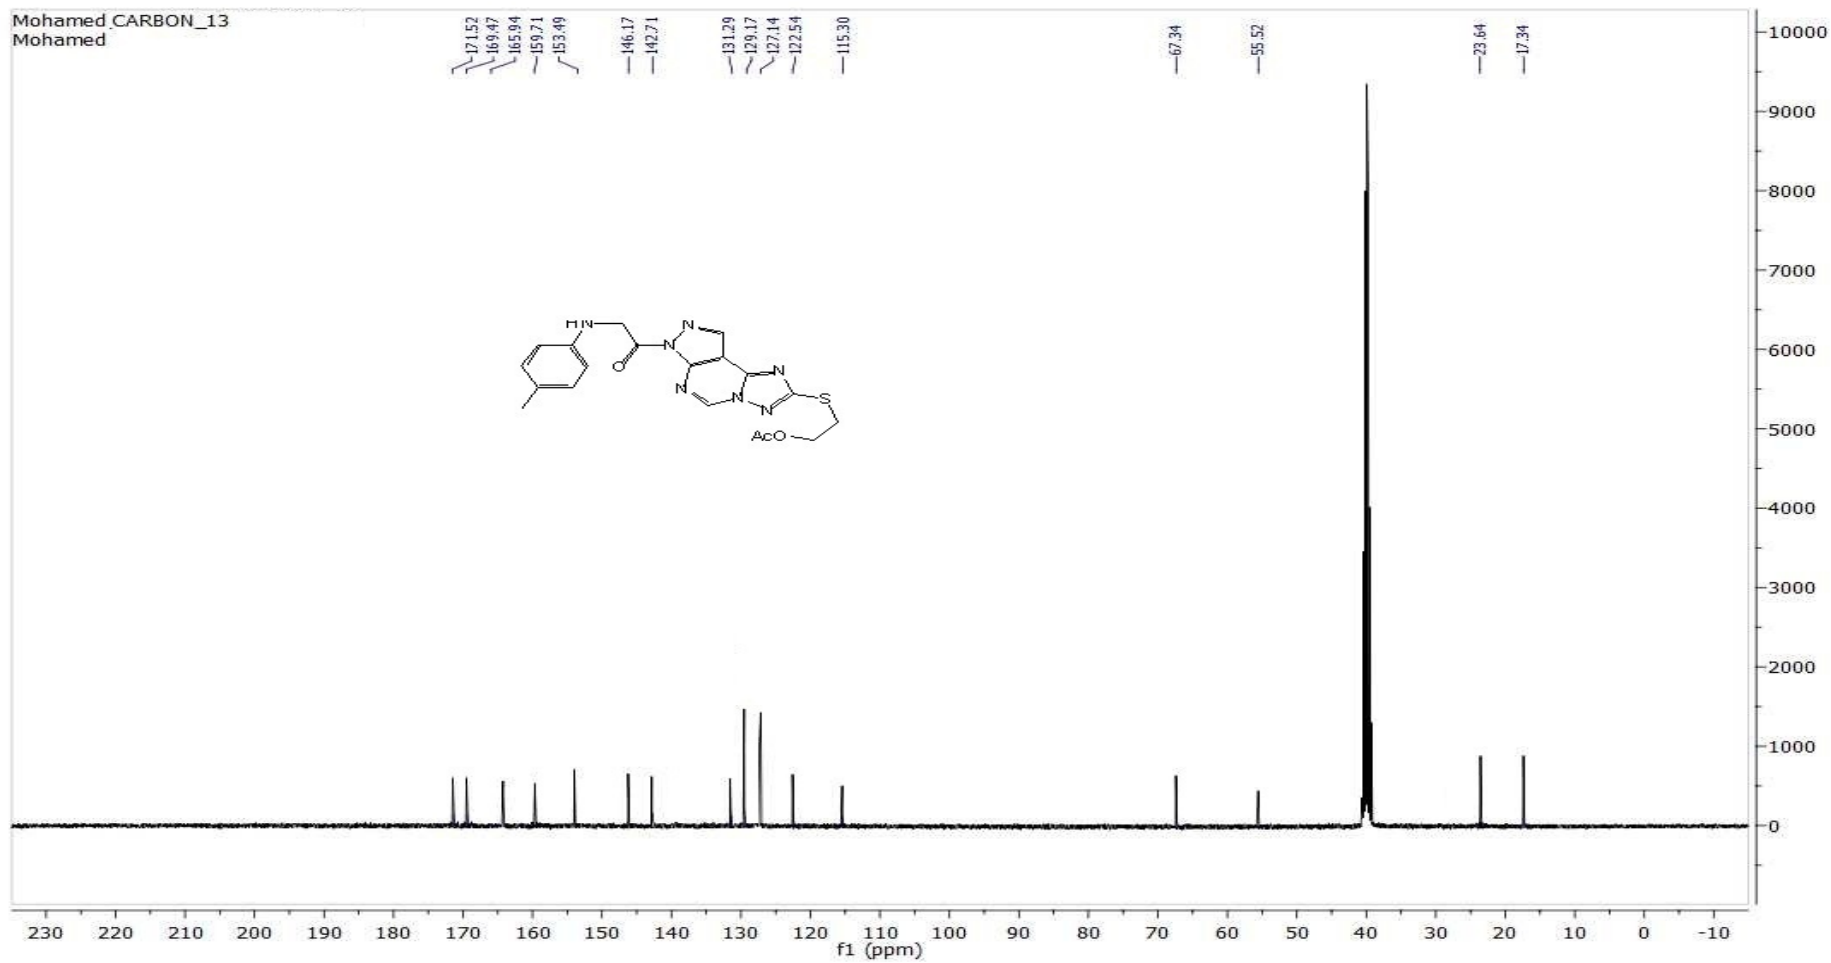

C<sup>13</sup>-NMR FOR COMP. 13

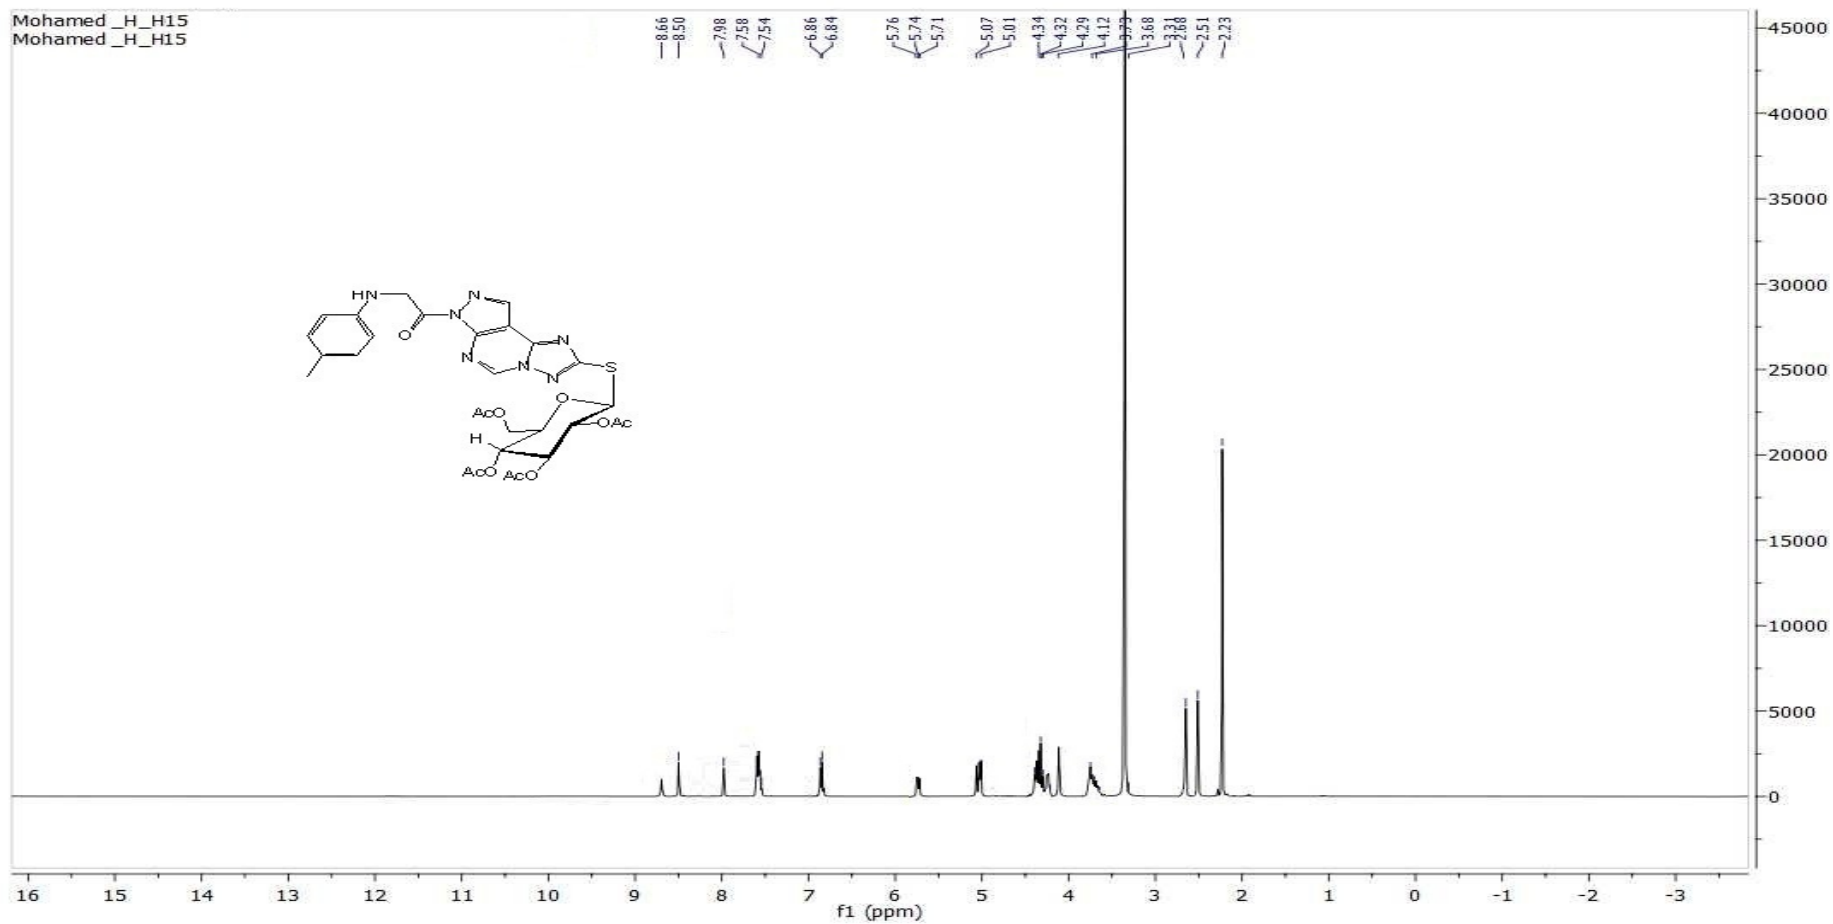

<sup>1</sup>H-NMR FOR COMP. 14

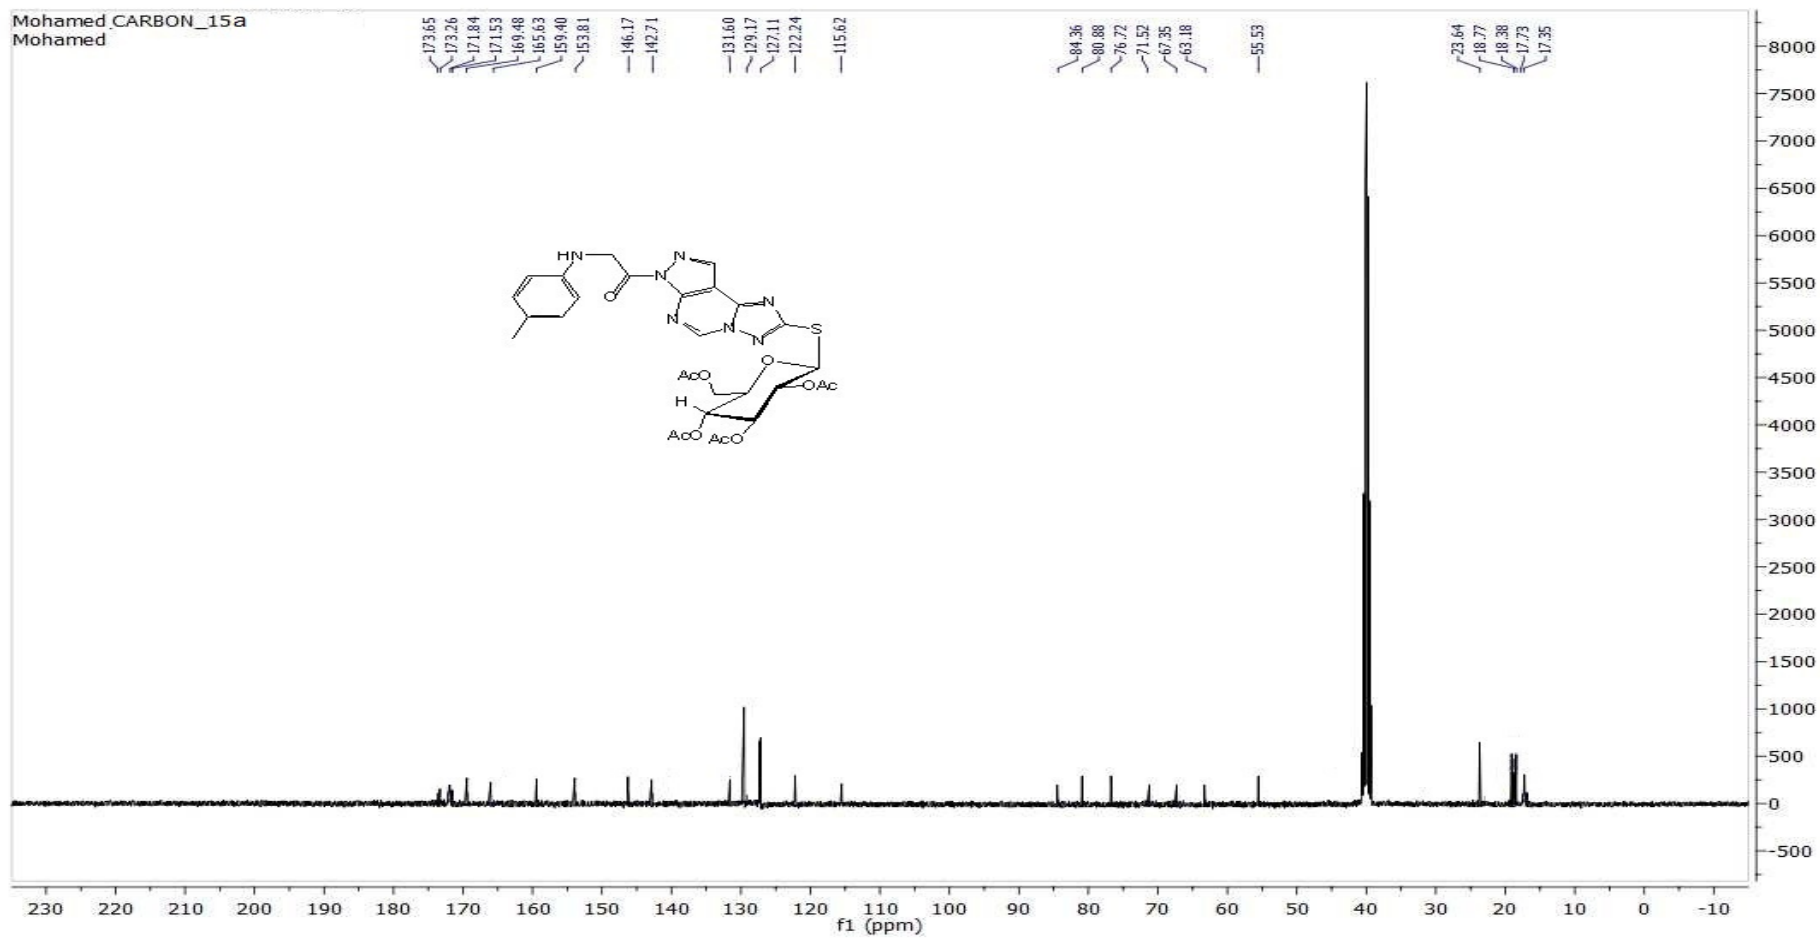

$C^{13}$ -NMR FOR COMP. 14

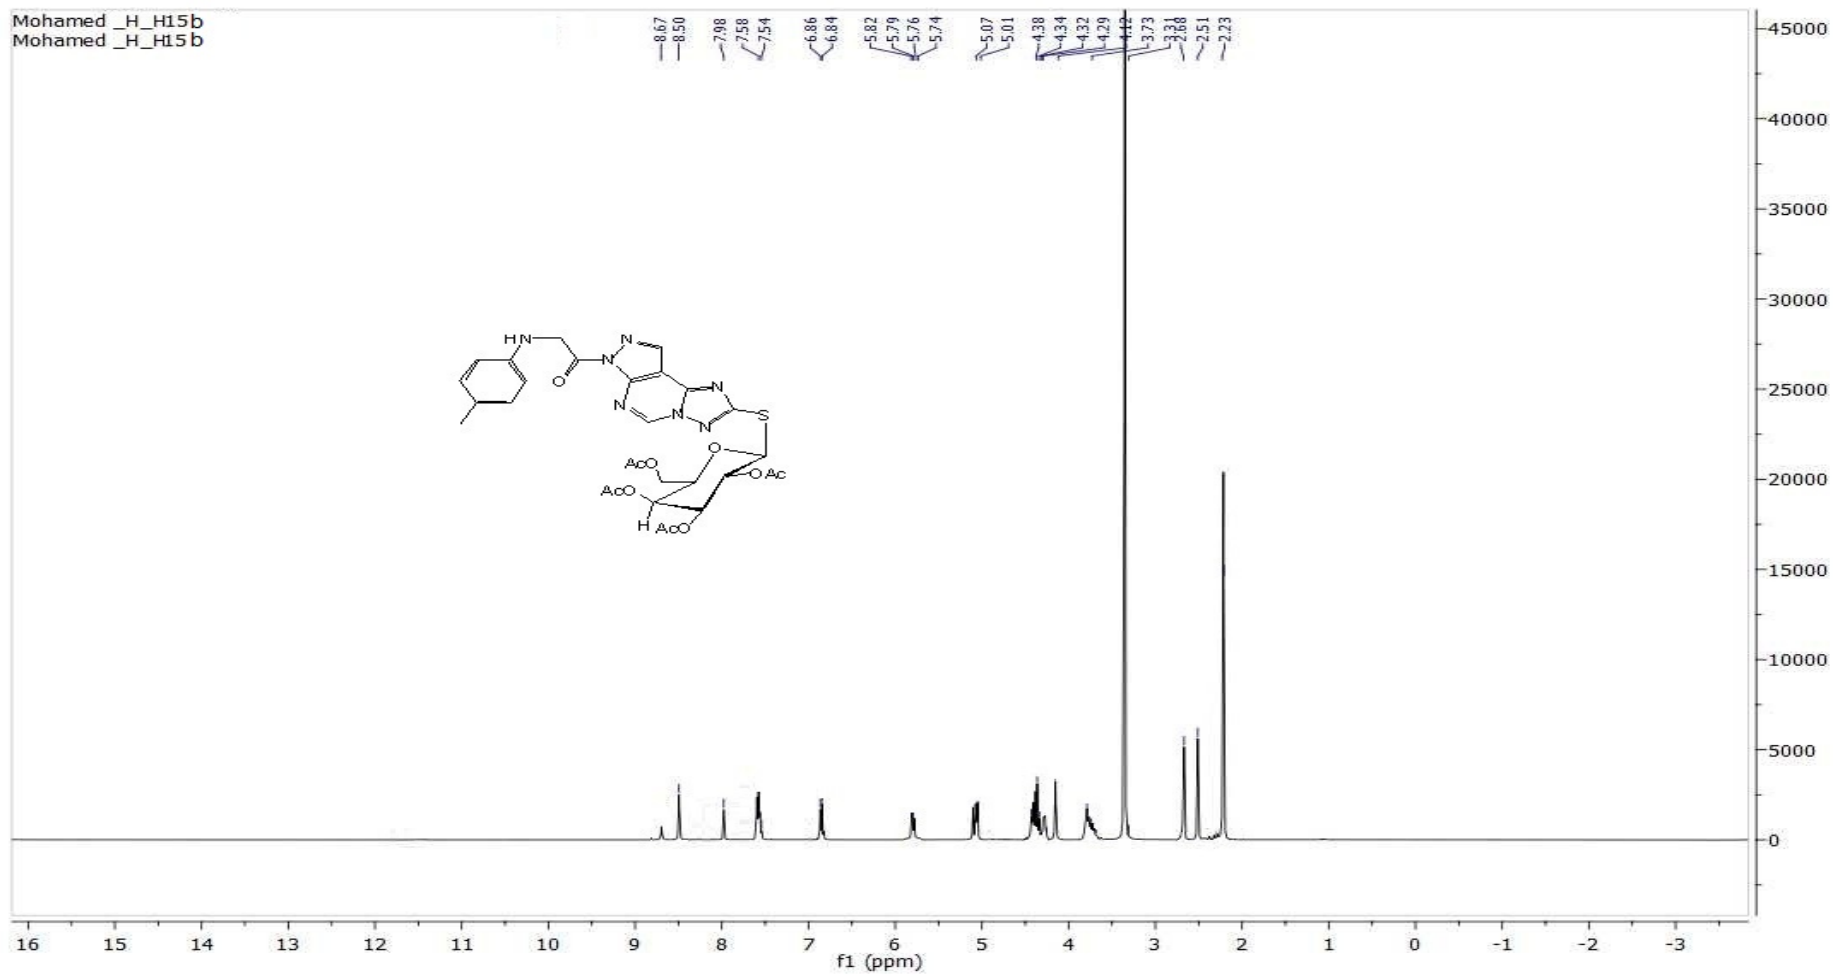

<sup>1</sup>H-NMR FOR COMP. 15

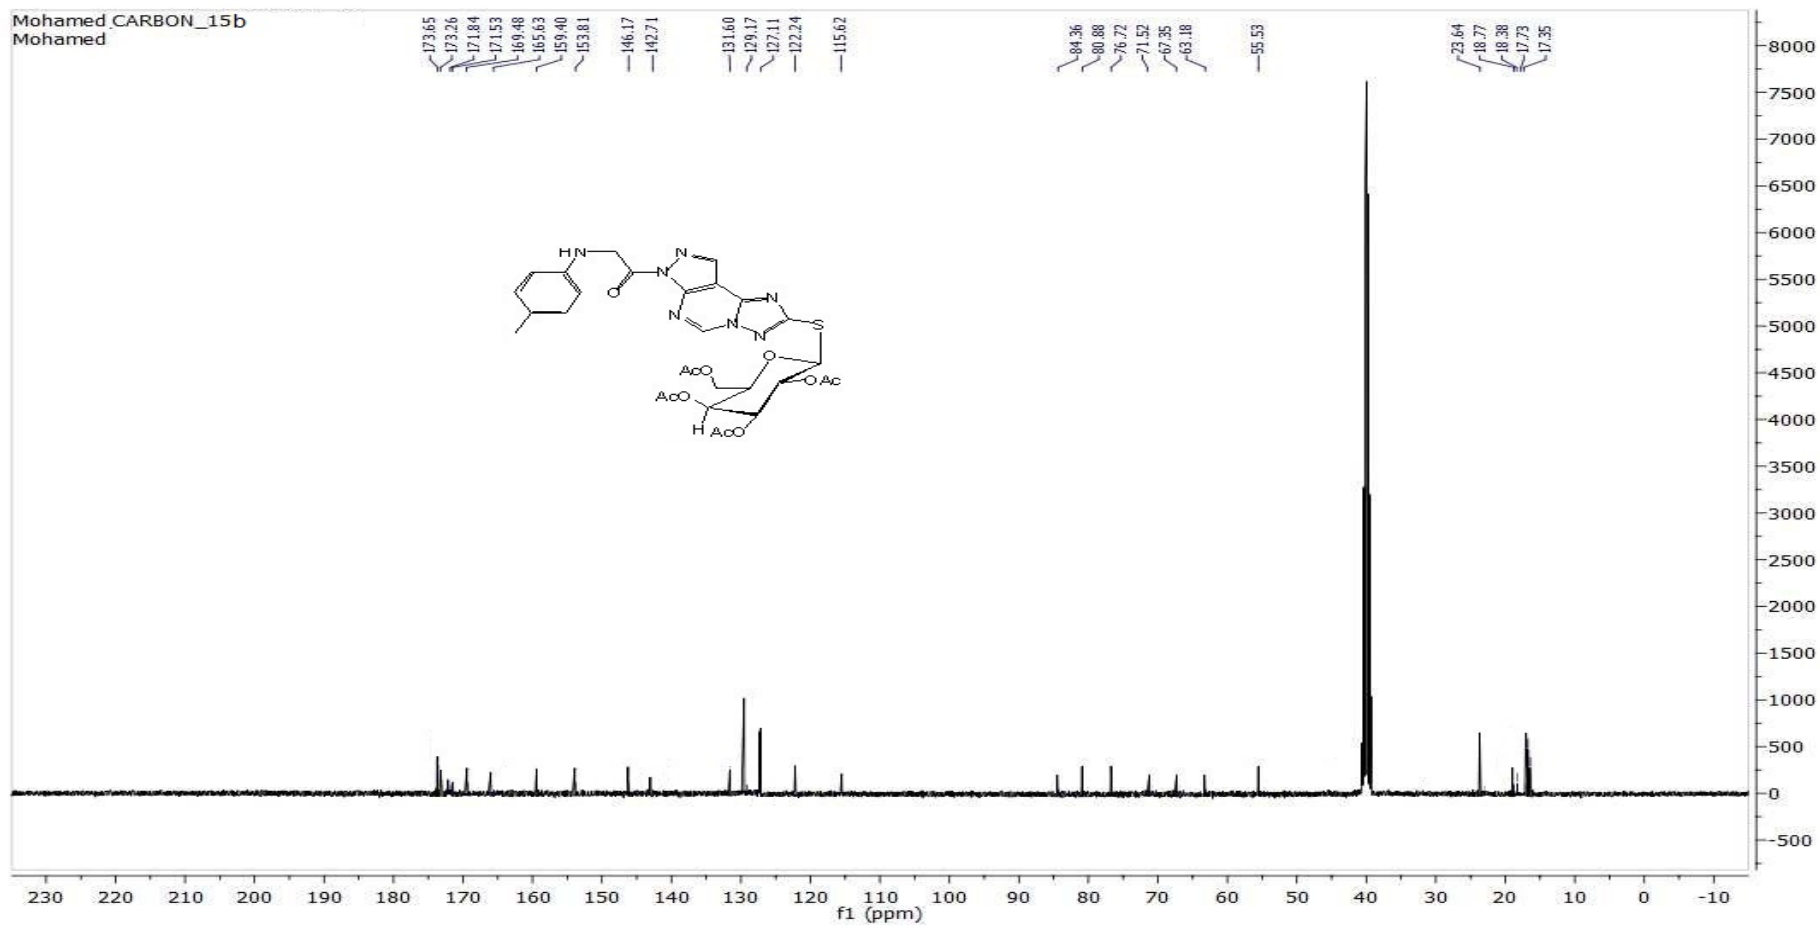

$C^{13}$ -NMR FOR COMP. 15
